# Supplementary material for: Comparison and Functional Analysis of Odorant-Binding Proteins and Chemosensory Proteins in Two Closely Related Thrips Species, Frankliniella occidentalis and Frankliniella intonsa (Thysanoptera: Thripidae) Based on Antennal Transcriptome Analysis
Source: MDPI journal article supplement (doi:10.3390/ijms232213900), 2022-11-11
Supplement: s1 [file s1]

Table S1 Information for nine samples used for transcriptome analysis

| Sample | Clean read number | Base number | GC content (%) | % $\geq$ Q30 |
|--------|-------------------|-------------|----------------|--------------|
| FTF1   | 39,000,448        | 5.37G       | 34.41          | 91.53        |
| FTF2   | 49,432,170        | 7.1 G       | 48.33          | 94.02        |
| FTF3   | 51,572,006        | 6.89 G      | 31.73          | 88.99        |
| WTF1   | 66,120,138        | 9.68 G      | 51.57          | 94.84        |
| WTF2   | 70,084,582        | 10.27 G     | 50.58          | 95.19        |
| WTF3   | 66,363,978        | 9.74 G      | 51.10          | 95.32        |

Table S2 An overview of the transcriptome sequencing and assembly of *F. occidentalis* and *F. intonsa* antennae transcriptome.

|            | Total<br>sequence<br>number | GC%   | Min<br>length | Median<br>length | Max<br>Length | Total<br>assembled<br>Bases | N50   |
|------------|-----------------------------|-------|---------------|------------------|---------------|-----------------------------|-------|
| Transcript | 74,380                      | 45.31 | 201           | 514              | 10408         | 59,876,343                  | 1,257 |
| Gene       | 48,889                      | 44.56 | 201           | 458              | 10408         | 36,818,905                  | 1,188 |

Table S3 Annotation information for *F. occidentalis* and *F. intonsa* unigenes in different databases.

| Database  | Num    | Ratio (%) |
|-----------|--------|-----------|
| All       | 48,889 | 100.00    |
| GO        | 18,484 | 37.81     |
| KEGG      | 11,111 | 22.73     |
| Pfam      | 18,772 | 38.40     |
| swissprot | 16,468 | 33.68     |
| eggNOG    | 22,490 | 46.00     |
| NR        | 21,362 | 43.69     |

Table S4 Pocket parameters of OBPs and CSPs in in *F. occidentalis* and *F. intonsa*.

| Species                           | Pocket name | Volume   | Surface  | pocket atoms | Hydrophobicity ratio | Simple Score |
|-----------------------------------|-------------|----------|----------|--------------|----------------------|--------------|
| <i>Frankliniella occidentalis</i> | FoccOBP1    | 599.23   | 866.79   | 120          | 0.54                 | 0.45         |
|                                   | FoccOBP2    | 703.68   | 1,085.93 | 171          | 0.44                 | 0.48         |
|                                   | FoccOBP3    | 1,350.46 | 1,607.61 | 266          | 0.44                 | 0.66         |
|                                   | FoccOBP4    | 1,409.41 | 1,792.74 | 274          | 0.44                 | 0.66         |
|                                   | FoccOBP5    | 1,039.1  | 1,345.69 | 168          | 0.48                 | 0.68         |
|                                   | FoccOBP6    | 934.27   | 1,155.44 | 221          | 0.39                 | 0.61         |
|                                   | FoccOBP7    | 768.96   | 1,375.26 | 175          | 0.53                 | 0.56         |
|                                   | FoccCSP1    | 1,326.02 | 1,665.12 | 247          | 0.38                 | 0.64         |
|                                   | FoccCSP2    | 1,379.39 | 1,453.56 | 265          | 0.46                 | 0.67         |
|                                   | FoccCSP3    | 1,211.46 | 1,468.77 | 240          | 0.51                 | 0.69         |
|                                   | FoccCSP4    | 558.72   | 881.04   | 172          | 0.46                 | 0.39         |
|                                   | FoccCSP5    | 1,219.78 | 1,391.13 | 228          | 0.44                 | 0.66         |
|                                   | FoccCSP6    | 1,219.78 | 1,391.13 | 228          | 0.44                 | 0.66         |
|                                   | FoccCSP7    | 1,597.12 | 1,921.07 | 296          | 0.45                 | 0.67         |
|                                   | FoccCSP8    | 788.61   | 1,429.47 | 212          | 0.37                 | 0.51         |
| <i>Frankliniella intonsa</i>      | FintOBP1    | 634.75   | 779.3    | 142          | 0.48                 | 0.45         |
|                                   | FintOBP2    | 929.66   | 1,316.53 | 197          | 0.48                 | 0.64         |
|                                   | FintOBP3    | 1,232.96 | 1,642.84 | 251          | 0.48                 | 0.68         |
|                                   | FintOBP4    | 1,356.42 | 1,991.59 | 311          | 0.44                 | 0.66         |
|                                   | FintOBP5    | 1,067.65 | 1,420.72 | 165          | 0.41                 | 0.65         |
|                                   | FintOBP6    | 1,203.07 | 1,329.34 | 258          | 0.39                 | 0.64         |
|                                   | FintCSP1    | 1,352.64 | 1,630.22 | 253          | 0.37                 | 0.63         |
|                                   | FintCSP2    | 1,439.55 | 1,525.58 | 265          | 0.46                 | 0.67         |
|                                   | FintCSP3    | 1,482.04 | 1,950.44 | 280          | 0.46                 | 0.67         |
|                                   | FintCSP4    | 558.72   | 881.04   | 172          | 0.46                 | 0.39         |
|                                   | FintCSP5    | 1,235.14 | 1,384.74 | 233          | 0.42                 | 0.66         |
|                                   | FintCSP6    | 1,055.17 | 1,002.28 | 199          | 0.45                 | 0.67         |

Table S5 Model templates of OBP and CSP genes of *F. occidentalis* and *F. intonsa*.

| Species                           | Gene name | Model template | Sequence identify | GMQE |
|-----------------------------------|-----------|----------------|-------------------|------|
| <i>Frankliniella occidentalis</i> | FoccOBP1  | 6jpm.1.A       | 30.36%            | 0.39 |
|                                   | FoccOBP2  | 2wck.1.A       | 21.24%            | 0.25 |
|                                   | FoccOBP3  | 1dqe.1.A       | 18.42%            | 0.35 |
|                                   | FoccOBP4  | 3bfb.1.A       | 29.06%            | 0.61 |
|                                   | FoccOBP5  | 6qq4.2.A       | 30.51%            | 0.56 |
|                                   | FoccOBP6  | 4f7f.4.A       | 18.92%            | 0.46 |
|                                   | FoccOBP7  | 4z45.1.A       | 20.99%            | 0.19 |
|                                   | FoccCSP1  | 1n8v.2.A       | 31.07%            | 0.50 |
|                                   | FoccCSP2  | 1n8v.2.A       | 46.79%            | 0.49 |
|                                   | FoccCSP3  | 1n8v.2.A       | 35.71%            | 0.52 |
|                                   | FoccCSP4  | 1n8v.2.A       | 22.73%            | 0.45 |
|                                   | FoccCSP5  | 1n8v.2.A       | 44.04%            | 0.52 |
|                                   | FoccCSP6  | 1n8v.2.A       | 45.71%            | 0.42 |
|                                   | FoccCSP7  | 1n8v.2.A       | 44.44%            | 0.48 |
|                                   | FoccCSP8  | 2gvs.1.A       | 30.26%            | 0.41 |
| <i>Frankliniella intonsa</i>      | FintOBP1  | 6jpm.1.A       | 24.58%            | 0.49 |
|                                   | FintOBP2  | 2wck.1.A       | 18.75%            | 0.22 |
|                                   | FintOBP3  | 6qq4.2.A       | 18.26%            | 0.42 |
|                                   | FintOBP4  | 3bfb.1.A       | 28.21%            | 0.62 |
|                                   | FintOBP5  | 6qq4.2.A       | 30.51%            | 0.61 |
|                                   | FintOBP6  | 4f7f.3.B       | 19.64%            | 0.46 |
|                                   | FintCSP1  | 1n8v.2.A       | 32.04%            | 0.50 |
|                                   | FintCSP2  | 1n8v.2.A       | 46.79%            | 0.49 |
|                                   | FintCSP3  | 1n8v.2.A       | 37.50%            | 0.52 |
|                                   | FintCSP4  | 1n8v.2.A       | 22.73%            | 0.46 |
|                                   | FintCSP5  | 1n8v.2.A       | 47.71%            | 0.52 |
|                                   | FintCSP6  | 1n8v.2.A       | 41.90%            | 0.41 |

Table S6 Primer sequences used for RT-qPCR in *F. occidentalis* and *F. intonsa*.

| Species                           | Gene name      | Forward Primer (5'~3') | Reverse Primer (5'~3') |
|-----------------------------------|----------------|------------------------|------------------------|
| <i>Frankliniella occidentalis</i> | FoccOBP1       | TCATCAACGCCTTCACTGAG   | GGTCGGGTCAACTTTCTTGA   |
|                                   | FoccOBP2       | CCCAACATGAATTTCCCTGA   | AGTCCAGGTATGCTCGGTTG   |
|                                   | FoccOBP3       | AAGGAGCTGATGCCTCGATA   | CGTTGCCCTCTTTCATCATT   |
|                                   | FoccOBP4       | CGATATGTTGCTCACCATGC   | TCTGGGGCCTTCTCATACAG   |
|                                   | FoccOBP5       | AAAGCGAGACGAAGCTCAAG   | CGCTTTTCGGTACTCTTTCG   |
|                                   | FoccOBP6       | AAGAAGCGCAAGCTCATGTC   | TCCCCTTGACGAGTCCTTG    |
|                                   | FoccOBP7       | CTTCACCGAGGACGAGAGAC   | GCGTAAAGCTTGACCAGTCC   |
|                                   | FoccCSP1       | TGCCAGAAGTGATTGACAGC   | CCAGTCGTCTGGACGGTTAT   |
|                                   | FoccCSP2       | AAGCGCCTCCTCAACAACTA   | CTTCTGCTTCTCGGAGCACT   |
|                                   | FoccCSP3       | AGGAGAGGCTGCCTAAGGAC   | TCTTGAAGTCCTCCCACACC   |
|                                   | FoccCSP4       | GGCTACGTCAAGTGCATCCT   | GATGATCACCTTCTGCTGCTC  |
|                                   | FoccCSP5       | CACCAACAAGTTCGACAACG   | GGCAGCGACTTTTTGAGTTC   |
|                                   | FoccCSP6       | TACATGGAATGCCTGATGGA   | GCGATCTGCTTCTGCTTCTC   |
|                                   | FoccCSP7       | TACACGTCGAGGTTTCGACAA  | TGATGCAGCGGAAGTAGTTG   |
|                                   | FoccCSP8       | ACAGCCTGAAGAGTGCCATC   | GGCGAGGATCATGTCGTAGT   |
| <i>Frankliniella intonsa</i>      | FintOBP1       | CCTCTTCATCAACTGCGTCA   | CCATGTAAAAAGCGTGGTT    |
|                                   | FintOBP2       | GCAGCAAATTGGTTTGGATT   | CGTGTAATTCCTCCCAAACG   |
|                                   | FintOBP3       | CCCAGGCAGACAAGAAAAAG   | TGTCGTTCCCTTCCTTCATC   |
|                                   | FintOBP4       | ATGACTGTGATGGACGACGA   | AAATCCTTGCAAGCGTTGAG   |
|                                   | FintOBP5       | AAAAAGGAGTGCAAGGAGCA   | CGCAGGCCATCAGTTTCTTA   |
|                                   | FintOBP6       | GACAAGCTCATCCCGGAGTA   | GTTACCCCTTCCTTCATCA    |
|                                   | FintCSP1       | TGCCAGAAGTGATTGACAGC   | TAACATGCTTCACGGCTTTG   |
|                                   | FintCSP2       | AAGCGCCTCCTCAACAACTA   | CTTCTGCTTCTCGGAGCACT   |
|                                   | FintCSP3       | AAGCGCCTCTTCGACAACCTA  | ACTTGGTGGACAGGTCCTTG   |
|                                   | FintCSP4       | GGCTACGTCAAGTGCATCCT   | GATGATCACCTTCTGCTGCTC  |
|                                   | FintCSP5       | CTTCAAGTGCTGATGGACA    | CCTTCTCGGTCTGCATCTTC   |
|                                   | FintCSP6       | AGCGCCTGCTCAAGAACTAC   | GTCCGGAATGATCTCCTTGA   |
| Reference                         | $\beta$ -actin | GGTATCGTCCTGGACTCTGGTG | GGGAAGGGCGTAACCTTCA    |
