# Supplementary material for: Comparison and Functional Analysis of Odorant-Binding Proteins and Chemosensory Proteins in Two Closely Related Thrips Species, Frankliniella occidentalis and Frankliniella intonsa (Thysanoptera: Thripidae) Based on Antennal Transcriptome Analysis
Source: MDPI journal article supplement (doi:10.3390/ijms232213900), 2022-11-11
Supplement: s1 [file s1]

>FoccOBP1

MDRPAALLCLAVLVALAATALCYPRPAPVVTPEQYEKSLKMLRNVCQPKTGMPADMLERMKGGEFV  
QDEKAYCYTACFLQTMMVLKNNKVDSKMFQMVKMMMLPDAAASVINAFTECEGTPAGAEP CETT  
GLFINC VKKVDPTFNVPAWAASVAKSTMLHTPDMLLPQDKNTPAFLYPQFLIKASICYKTMKTAPK  
NDKF

>FintOBP1

MDRPGALLSLLAVLLALSATALCHPRPRPAPLVTPPEQYEKSLKMLRNVCVPTGIPEDMLNRMKGGEF  
VQDEKAYCYTACFLQTMMVLKNNKVDSKMFQLQVKMMMLPDAAARVIAAFTSCEGTPAGAEP CETT  
TGLFINC VKKVDPTFNVPAWTHHNAKPHRRRLREREPRLFTWHH

>FoccOBP2

MSASTILSIVATVITSGRAAYNLDNPYYNSALFDQMDDFYMPKSENFAADSDPELRQKMSFSNEICC  
GTYSKDNMMREDNVSRECYEEVFKSSDFLDSWNYFDTDAAKTVAQKVCLQQCMWKSGTMDD  
RYDSL TGLSDRYSEGSGSKEPNMNFPEVAVAKCLPSSNPDPASNWFGFGSSDCNRAYLDFS YCVW  
EELHADCPSQLWDSDNKWCEETKEYLQARSQ LTKS\*

>FintOBP2

MDAPTLIGVVIATVVASASAATYNLDNPYFNRS LFDQLDDYYMPNSENFAESDPELRSKMSFSNEM  
CCGTYTDKNMIREDNMSKECYDQVFKSPDFLDSWNYFN TDSASGVAQSVVCLQCLWKKRGTMDD  
DRYDSL TGRLSDSYSEGSGKKEPNMNFPEVAVAKCLPASNPDPANWFGFGSSDCNRAYLDFS YCV  
WEELHANCPARLWDFNNKWCEETKEYLLVRSQ LTKKWSGLVKNVSWIVRNTPM MISCQ\*

>FoccOBP3

MQGYTVLAAAALIAMASLAQADKKKELMPRYLKYTLECAKELNAEVGVCKEMMKEGNDNSADKYQ  
PCKCVIACVAKKAKVMTDAGEANVEAFTA AVDEF EIKESWSEWQRVKPLCEPEVKGKKDCVLGYDFF  
TCGYDKSEIFRDVMKKFMGAMDKS\*

>FintOBP3

MQSSTVLLVAALVAMASLAQADKKKELMPRYIKYALECAKELNAEVGVCKEMMKEGNDNSAEKYQP  
CKCVIACVAKKAKVMTDGGDANVDAFTA AVDEF EIKESWSEWQRVKPLCEPEVKGKKDCVLGYDFF  
TCGYEKSEIFRDVIKKFMGAMDKS\*

>FoccOBP4

MKTLTLLAALLALCGLASAGVELSEDQKQLMKQLSSAYMAETGVDEATIDACKTGQFADDPKLKCY  
LKCTYQQMTVMDDDGVDADM LLM LPEEIQPKAEPV V NACKEMRGADACDNAMMFNKCLYEK  
APDYYMVV\*

>FintOBP4

MKTVLPLVVVLLALCGMASAGVELSEDQKQLMKQLSTACMAETGVDEATIDACKSGQFADDPKLK  
YLKCTYQQMTVMDDDGAVDADM LMLPEGMQPKAEPILNACKDLRGTDACDNAMIFNKCLYD  
KAPEYYMVV\*

>FoccOBP5

MKVFVLLAVALVAYASADEAARERAKAIKKECKEQAGATDDDLKELKEKDELLSPVNKKLMACVFSKN  
KIMQNNKFSKEGSMEVARELMSGRPESETKLKIAEQIADNCAKEIGNVETTGD EMAKLIFNCLKKQAK  
EYRKAMATVPNQDISQSSW

>FintOBP5

MKVLLIALALAACAACAVADDAARERAKAIKKECKEQVGATDDDVKELKEKDQLLSPVNKKLMACVF  
SKNKIMQNNKFSKEGSMQVARELMSGRPSSESKLKIAEQIADNCAQEIGDVETSGEEMAKLIFNCLKK  
QAKESGFPSPHVW

>FoccOBP6

MKAVNVVVLVVA AVLAVASAEDNRDKLPEYMAAAMDVCVDYEMDFTVCKEMMKDGVNLAEKF  
TPCKCVPACVAKKRKLMSEDGEYDVDAFTKAVNEFGYEPWSEYKVPICKDSYKGKKNCEAAAAL  
AVCAWKN SKMMRDTVGQYMGQMDGE\*

>FintOBP6

MKAVNVVVLAAAAALVQPAAAEDNRDKLPEYMAAAMDVCVDYEMDFTVCKEMMKDGVNLAEKF  
YKPKCVPACVAKKRKLMSEDGEYDVDAFGKAVFEFGYEPWSEYKVPICKDSYKGKKNCEAAAAL  
LAVCAWKN SKMMRDTIGQYMGQMDGE\*

>FoccOBP7

MHILPVAVLALAAALAAVEAAAAPQLVRGRCATPPAAPQRIEKVINECQEDIKLSILEEALSVLGESTGISS  
DAKTRQPGKSSARRQAFTEDSRIAGCLLHCYKVKVKNLSAGLPTGEGVLKLYAEGVQDASYFLATA  
QAVNHCLGAAQQQGSLLPQAVKEPGQKCYLAYDLFECVSDQIMEYCGASP\*

>ApisOBP1

MLNLKVMMLCLSVIVVYCESDQVPINSSAAVESCLLETNMTRDEFEDMLTSPNARELTILKSHAHKC  
MFGCVMRKNHIVNDGVVSKEVLSKYVLNFYGRPDYKRRLIKDVEHIVDVC AKKVADESETDECELAA  
TLVTCIVLEANKAGLVDDPARQI

>ApisOBP2

MKVSAATAVLVALVATVQSSDPCNISTCYKSGTTKPPMAVTPHLPVQSSSTQTSHPQTTYAKDHHVH  
GSTTTKSGVNATVTTASGASVNGTEPPAVVKSSAGVTGNSTTPKPTMTEGHVALKQKLNITIAVKCKD  
ELHAPQEIMALVSNTVVPQNEQQRCYLECVYKNLNLKNNKFSVEDGKAMARIRFANQPEEHKKA VT  
IETCEKEAVIDPKTTEKCAAGR VIRNCFVKNGEKINFFPKA

>ApisOBP3

MISSTFYITLVFGIAMLISCGHGRFTTEQIDYYGKACNASEDDL VVVVKSYPVPTTETGKCLMKCMITKLG  
LLNDDGSYNKTGMEAGLKKYWSEWSTEKIESINNKC YEEALLVSKEVVATCNYSYTMACLNKQLDL  
DKST

>ApisOBP4

MRGNYSMVFLLFAIGFQDIFCQKQEPGKCRAPDKAPLNLEIIINTCQEEIKSALLQEALDILNDGNVE  
QNTPNYSSRSKREAEEDLTNEERRVAGCLLQCVYKVKVAVDETGFPPVDGLMKLYNEGVQDRNYIA  
TLSAVRHCISIAQQLKQQQPSKSFDDGQTCDLAYEMFECVSEKIEENCGVENKSN

>ApisOBP5

MSANSATIKCIAVAAILLQISVIFADAGHHRRGKELLDTEDSDFFRCKQASRKSCCGPENAMKRF GDK  
DKVAAD ECYA QVAEK FATVTATTPKQDLFSAEAVKITKKKQFCLHECIGKKNLLTEDGSLNKTFIADY  
AMKSVFKEQWQKQVGQKALDKCLEETYIPWPAEDKENVCNPVYVQFQHCLWLQYESNCPANKIKI  
TKKCEKTRNRYRMQKSTSN

>ApisOBP6

MQKVVFICIFAIICQTVFTAGYDRTWILRQKRGNTNDDCRTLPSSEKKLPSCCQMPNLPNLSTWEK  
CFETFKQFKDKPETKEYKEMAHGKEPPCLFQCIFMQSGLTTS DGKLNEDAITKKMSEGINNDEKWKSI  
WQNSLNKCFDDVKQEDKKQILIMNTPAGRLMKCFLRDMYMSCPKNVVWVESSECLNMKDLVQKCP  
EMPPP VFKSPPKLI

>ApisOBP7

MVARKRMYNMLPTTVLFIAAATVLKDCDAYLSEAAIKKTQQMLKTVCSKKHSVEEDVFTNIKKGIFPE  
DNNNIKCYFACNFKTMQLINQKGVIDKKMFKDKMSMMAPPNVYKILLPVIEQCTGKDKGEELCQSSY  
NVIKCAHSVDPKSLEFLPL

>ApisOBP8

MFALKVACLCLSVAVVFGENNQQNGPSDRSATIFQSCIAETKLSGDALKGFRSMSIPKTQAEKCM MG

CLMRKVVNVINKGKFSVEEATKVAQKYYGTNEAMMKKAKDLIDVCAKKAQSTTEECALAGIVTTCIVEE  
AQKAGLSGGPGSRSRRTVSPKFRRDAM

>ApisOBP9

MIKKTLLLSVFVLFGLFSINKADDADAKDKELMSKLFVVFCKFDADWGTCGEMITTKYDITQAKYK  
QCTCHMACAGEELGMINASGQPEPAKFLEYVNKINNPDIKSQLQLIYDKCQNVKGSEKCDLAEQFAI  
CAFKESPALKERVSTLMEMLVKMKPKSK

>ApisOBP10

MEHLRSTNVVFAIVMALLVVQSSTRPQPDMEIEIKRTLYNACAGKFPITEEIKNNAKNSIISDDPTFKCF  
LKCCFDEMSMIDEDGIIDGDSLKAMAPDHIKPILEQVIPSCTKNVKQDGCEASFEFISCGIKLNPLIVALL  
PL

>ApisOBP11

MSSSTFYITLLFGIAMLISCGYGIFTTEQIDYYGKACNASEDDLIVLKSYPSTETGKCLMKCMITKLGLL  
NDDGSYNKTGMEAGLKKYWSEWATEKIETINEKCYEEALLVSAEIIATCNYSYTVMACLNKKLDLDKLT

>ApisOBP12

MEHLRSKNVVFAIVMALLIRPKTDGNDIAEEMKNTLYNICSTKYRITEELKNNVKKSIISDDPTFKCFLKC  
CFDEMSLIDEDGIIDGDSMIQMTSDDDKLIAEQVIPNCIKTVKQDSCEAAFDVSCVIKLNPNSTAALLPL

>ApisOBP13

MSLLNSGGCCGHSTTTVMTLVAILLTVGQVHNLKCRADHSRRHGEFIDIAEQCNNTTSGDRPAS  
AVDGDYSTYASGGDNDGRWNGDGRRNNNNNREFSVNRQDFTGNRGSGGGYDRDQSSCSEARP  
QQYSGNTGSRSKNHRQGSYPSADYDSGQSNSNYNRQSLPTRRYRRDDSNEKSKRQKAAVTGSNN  
RLLGNNRFRNMTKTGGNQPGKGYLDKMDACTIHCFVFNQLEMLNSNSRPDKYSIVNIMTNQIKDVE  
LKEFIQDSIDECFDTLELDSHNNKCEFSKNFAVCMENKAQRNCDDWDENLSANKINSAGLQDGTNQ  
QDKRKG

>ApisOBP14

MSSSTFYLTLLFGIAILISCGYGTFTTEQIDYYGRACKASEDDLVVVKSYPSTETGKCLMKCMITKLGL  
LNDDGSYNKTGMEAGLKKYWSEWSTEKIEAINNKCYEEALLVPKEIVATCDYSYTVMACLNKQMDLD  
KLT

>AmelOBP1

MASNTKQAFIYSLALLCLHAIFVNAAPDWVPPEVFDLVAEDKARCMSEHGTTQAQIDDVDKGNLVN  
EPSITCYMYCLLEAFSLVDDEANVDEDIMLGLLPDQLQERAQSVMGKCLPTSUSDNCNKIYNLAKCV  
QESAPDVWVFI

>AmelOBP2

MNTLVTVTCLLAALTVVRGIDQDTVAKYMEYLMPDIMPCADELHISEDIAATNIQAAKNGADMSQL  
GCLKACVMKRIEMLKGTELYVEPVYKMIEVVHAGNADDIQLVKGIANECIENAKGETDECNIGNKYTD  
CYIEKLFS

>AmelOBP3

MKTIVILLFTLCIVSYMMVRCDDITLCLKQENLNLDIDSLLEDESERMLRKRGCIEACLFHRLALMND  
NVFDVSKFDVYLNDDTMDMDLKDSSIRKIIRQCVDNAKNEDKCLTAQKFSRCVIDYVKFHITQYMN  
ANSNTTSEEESDNT

>AmelOBP4

MKITIVSLLCVIYCALVHADTVAILCSQKAGFDLSCLKSMYESNSEEQMKKLGCFEACVFQKLHFMDG  
NTLNVEKLESGTRELPDDFTEDVHEIEQCVSKAADEDECMVARKYIDCALEKMKFLDDELEKIAGN

>AmelOBP5

MHVKSVLLITIVTFVALKPVKMSADQVEKLAKNMRKSCLQKIAITEELVDGMRRGEFPDDHDLQCY

TTCIMKLLRTFKNGNFDMDIVKQLEITMPPEEVVIGKEIVAVCRNEEYTGDDCQKTYQYVQCHYKQN  
PEKFFFP

>AmelOBP6

MKGLGVSLLVALLVLLAIEDTMSKKMTIEEAKKTIKNLRKVCSKKNDTPKELLDGQFRGEFPQDERLM  
CYMKCIMIATKAMKNDVILWDFVKNARMILLEEYIPRVESVVETCKKEVTSTEGCEVAWQFGKCIYEN  
DKELYLAP

>AmelOBP7

MKKFLVIFVYILSVAVIIRANGINEILKIMAVSMKDIRYCIHMGLTFKDFIKMQELLQEEDISEGNIKKYLT  
NYS CFITCALEKSHIIQNDEIQLDKLVEMANRKNISIDVKMLSECINANKSTDKCENGLNFIICFSKLLSD  
MYEDTFEDTLKHKSYV

>AmelOBP8

MTIEELKKTIKNLRKVCSKKNDTPKELLDGQFRGEFPQDERLMCYMKCIMIATKAMKNDVILWDFVKN  
NARMILLEEYIPRVESVVETCKKEVTSTEGCEVAWQFGKCIYENDKELYLAP

>AmelOBP9

MFKNYHFFFILVITLIFLYFGEADIKDCRKESKVSWAALKKMKAGDMEQDDQNLKCYLKCFMTKHGIL  
DKNAEVDVQKALRHLPRSMQDSTKKLFNKCKSIQNEDPCEKAYQLVKCYVEFHPEVLQTPVFL

>AmelOBP10

MKYSILLSLLITCLICSPSVHCGTRPSFVSDEMIATAASVVNACQTQTGVATVDIEAVRNGQWPETRQL  
KCYMYCLWEQFGLVDDKRELSLNGMLTFFQRIPAYRAEVQKAISECKGIAKGDNCEYAYRFNKCYAEL  
SPRTYYLF

>AmelOBP11

MKAAEIWLVSlyWYLILQIALVYGEISDIDFREMITSKYRKKCIGETKTTIEDVEATEYGEFPEDEKLKCYF  
NCVLEKFNVMDDKNGKIRYNLLKKVIPEAFKEIGVEMIDSCSNVDSSDKCEKSFMMKCMYEVNPIAFI  
AP

>AmelOBP12

MLYNNLTIVIIIMCGVQNLRRSVNIFQDIADCVDNRNMTFHELKKLRDSSEARIKLINEEENFRNYGC  
FLACIWQQGTGVMNGSELSTYNIAGIIEGQYHDDDELKTFHFKIALTCEDDVHRKFLHVNDECDVALSF  
KLCMLKAMRNYP

>AmelOBP13

MKTIIFIFAFCLVGILAVSEESINKLRKIESVCAEENGIDLKKADDVKKGIFDKNDEKLACYVDCMLKKVGF  
VNADTTFNEEKFRERTTKLDSEQVNRLVNNCKDITESNSCKKSKLLQCFIDNNLMKIFE

>AmelOBP14

MKTIVLIFGFCVCGALTIEELKTRLHTEQSVCKTETGIDQQKANDVIEGNIDVEDKKVQLYCECILKNF  
NILDKNNVFKPQGIKAVMELLIDENSVKQLVSDCSTISEENPHLKASKLVQCVSKYKTMKSVDL

>AmelOBP15

MKTILIISAICICVGALS IKDFQNAIRMGQSICMAKTGINKQIINDVNDGKINIEDENVQLYIECAMKKFS  
FVDKDGNFNEHVSREIAKIFLNENEINQLITECSAISDTNVHLKITKIFQCITKFKTINDILNS

>AmelOBP16

MKTFVIIAICVCVGAMTHEELKTGIQTLQPICVGETGTSQKIIDEVYNGNVNVEDENVQSYVECMMK  
KFNVDENGNFNEKNTRDIVQAVLDDNETDQLIVECSPISDANVHIKISKIFQCFMKYKTITDILNS

>AmelOBP17

MKTIVIISAICVCVSAMTLDLKSGLHTVQSVCMKEIGTAQQIIDDINEGKINMDDENVLLFIECTMKKF  
NVVDENANFNKISSDIVRAVLNDNEADQLLAECSPISDPNALIKISKILECFFKYKTINQILNS

>AmelOBP18

MKTFVIISAICVCVGALTLEEFQIGLRVVPICRIETSIDQQKEDDFRDGNIDVEDEKVQLFSECLIKKFNG  
YDDGGNFNEVVIREIAEIFLDENGVNKLITECSAISDADLAVKSALLKICIGKYKTLKEMLSG

>AmelOBP19

MKTIVVIFAFCICVNAMTIEELKIQLRDVQEICKAESGIDQQTVDINEVNFDVEDEKPQRYNECILKQF  
NIVDESGNFKENIVQELTSIYLDENVIKLVAECSVISDANIYIRFNKLVKCFGKYKTMKEVLNL

>AmelOBP20

MKTIVVIFAFCICVNAMTIEELKIQLHVDVQEICKTESGIDQQTVDINEVNFDVEDEKPQRYNECILKQF  
NIVDESGNFKENIVQELTSIYLDENVIKLVAECSVISDANIYIRFNKLVKCFGKYKTMKEVLNL

>AmelOBP21

MKTIVIISAICVCVGALTLEELQIGLRVIPVCRIDSGIDEKKEDDFRNGIIDVENEKVQLFSECLIKKFNAY  
DDGGNFNEVVIREIAEIYLDENEVNKLITECSAISDADIHLKSSKLIKCFAYKTLKEIMNE

>DmelOBP18a

RVNAEGCLKHHNLTSAQVQAVAPSTPVADVPVAVKCYSRCLIQDYFGDDGKIDLQKVGKRGSQED  
HVLSQCKQQFDGVTNLDTCDYPYLILQCYFKGKQSGTAS

>DmelOBP19a

GVTEEQMWSAGKLMRDVCLPKYPKVSVEVADNIRNGDIPNSKDTNICYINCILEMMQAIKKGKFQLES  
TLKQMDIMLPDSYKDEYRKGINLCKDSTVGLKNAPNCDPAHALLSCLKNNIKVFVFP

>DmelOBP19b

DEEEGSMTVDEVVELIEPFGDACTPKPSRENIVEMVLNKEDAKHETKCFRHCMLQFELMPEDQLQY  
NEDKTVDMINMMFPDREDDGRRIVKTCNEELKAEQDKCEAAHGAMCMLREMRSSGFKIPEIKE

>DmelOBP19c

QTQAFDLAKLLPKTGTEPIWAVIDRNLPQVQELVTAARMECIQKLQLPRDQRPLGKVTNPSEKEKCLV  
ECVLKKIKLMDADNKLNVGQVEKLTSLVTQDNKMAIAVSSSMAQACSRGISSKNPCEVAHLFNQCIS  
RQLERNNVKLVW

>DmelOBP19d

KPHEEINRDHAAELANECKAETGATDEDVEQLMSHDLPERHEAKCLRACVMKKLQIMDESGKLNKE  
HAIELVKVMSKHDAEKEDAPAEVVAKCEAIETPEDHCDAAAFAYEECIYEQMKEHGLEEEH

>DmelOBP22a

TKEPEEVKIVSECAKENNVHRKKALDLLMSYRLKKKTHNVMCFINCIFERTNILQKVKEKVKENHNCD  
SIKDADKCAESFQKFQCLVKIEMKVRGIDRG

>DmelOBP28a

FDEKEALAKLMESAESCMPEVGATDADLQEMVKKQPASTYAGKCLRACVMKNIGILDANGKLDTEA  
GHEKAKQYTGNDPAKLKIALEIGDTCAAITVPDDHCEAAEAYGTCFRGEAKKHGLL

>DmelOBP47a

RFAKININLGLTVADESPKTITEEMIRLCGDQTDISLRELNLQREDFSDPSESVCFTHCLYEQMGLM  
HDGVFVERDLFGLLSDVSNTDYWPERQCHAIRGNNKCETAYRIHQCCQQLKQQQNLLATKEVEV  
TTTPAGSDETKP

>DmelOBP51a

LFESANECAKKLGITPDYFENFPHSSRVKCFYHCQMEKLEIIANGVVTPFDLKVNLISPESYDKYGVKV  
KPCLKLSHRDKCELGYLVFQCLKREFNL

>DmelOBP56a

SSLNLSDEQKDLAKQHREQCAEEVKLTEEEKAKVNAKDFNNPTENIKCFANCFEKGTLKDGELQES  
VVLEKLGALIGEETKAALEKCRITKGENKCDTASKLYDCFESFKPAPEAKA

>DmelOBP56b

QSAAELAAYKQIQACIKELNIAASDANLLTTDKEVANPSESVKCYHSCVYKKLGLLGDDGKPNTDKI  
VKLAQIRFSSLPVDKLSLLTSCGTTKSAATCDFVYNYEKC VVKGISA

>DmelOBP56c

KAWVMFFIFYISFTRSLSVSLNMSMTRTLVPDPNGTENKLSQEMLRACMRRTAISMSQLKLFHMSL  
MNSDYNNDNDIAPTPVQSIGDVNNLGDLD FNGNSQMPYLDLKHNEPLQCFVSCLYETL DLD RY NV  
LLEAFKNQVQTIIQHEKAEIKECSDLQGKTRCEAAAYKLHLCYNHLKTLAEQRIREILERTEAENEGFGP  
EGSDFIDGIQHSGEAMTTAKSE

>DmelOBP56d

ELQLSDEQKAVAHANGALCAQQEGITKDQAIALRNGNFDDSDPKVKCFANCFLEKIGFLINGEVQPD  
VVLAKLGPLAGEDAVKAVQAKCDATKGADKCDTAYQLFECYK NRAHI

>DmelOBP56e

SAVGLTDSQKAEAKQRAKACVKQEGITKEQAIALRSGNFADSDPKVKCFANCFLEQTGLVANGQIKP  
DVVLAKLGPIAGEANVKEVQAKCDSTKGADKCDTSYLLYKCYENHAQF

>DmelOBP56f

MKSSEKIKACLKRQLGYTITENTKFDKEDSLQSKCFYHCLLEVKGVIANDAISSSEQPRKVLEKKYGITDT  
DELEKAEKCHSIKASGKCELGYEILKCYQSITKH

>DmelOBP56g

QQANIDSSVSKELVTDCLKENGVT PQDLADLQSGKVKAEADKDNVKCSSQCILVKSGFMDSTGKLLT  
DKIKSYANSNFKDVIEKDLDRCSAVKGANACDTAFKILSCFQAAN

>DmelOBP56h

NPDFRQIMQQCMETNQVTEADLKEFMASGMQSSAKENLKCYTKCLMEKQGHLTNGQFNAQAML  
DTLKNVPQIKDKMDEISSGVNACKDIKGTND CDTAFKVTMCLKEHKAIPGHH

>DmelOBP56i

GPIKDQCMAAAGITAQDVANRHETDDPGHSVKCFRCFLENIGIADNQIIPGAFDRV LGHIVTAEAV  
ERMEATCNMIKSETSHDESCEFAWQISECYEGVRLSDVKKGQRTRNHRG

>DmelOBP57a

KESQPFDFEGTYDDFIDCLRINNITIEYEKFDDTDNLDNV LKENVELKHKCNICKQLEREPTKWL NAR  
GEVDLKSMKATSETAVSISKMEKAPQETCAYVYKL VICA FKGHSVIKFD SYEQIQEETAGLIAEQQA  
DLFDYDTIDL

>DmelOBP57b

RHPFDIFHWNWQDFQECLQVNNITIGEYKYARHETLDYLLNEKVDLRYKCNICKQLERDSTKWLNA  
QGRMDL DLMNTTDKASKSITKMEKAPEELCAYSFRLVMCAFKAGHPVIDSE

>DmelOBP57c

QSLSLLEETNYVSDCLASNISQAEFQELIDRNSSEEDDLENTDRRYKCFIHCLAEGNLLDTNGYLDV  
DKIDQIEPVSD ELREILYDCKKIYDEEEDHCEYAFKMVTCLTESFEQSDEVTEAGKNTNKLNE

>DmelOBP57d

MPEKMSRLVPHLACIIFILEIQFRIADSNDPCPHNQGIDEDIAESILGDWPANVDLT SVKRSHKCYVTC  
ILQYYNIVTASGEIFLDKYYDTGVIDELAVAPKINRCRYEFRMETDYCSRIFAIFNCLRQEILTKS

>DmelOBP57e

NPCVSQNELSEYEAHQVMENWPVPPIDRAYKCF LTCVLLDLGLIDERGNVQIDKYMKSGVVDWQW  
VAIELVTCRIEFS DERDLCELSYGIFNCFKDVKLAAEKYVSISNAK

>DmelOBP59a

LKCRSQEGLSEAELKRTVRNCMHRQDEDED RGRGGQGRQGN GYEYGYGMDHDQEEQDRNPGNR  
GGYGNNRRQRGLRQSDGRNHTSNDGGQCVAQCFFEEMNMVDGNGMPDRRKVS YLLTKDLRDREL

RNFFDTVQQCFRYLESNGRGRHHKCSAARELVKCMSEYAKAQCEDWEEHGNMLFN  
>DmelOBP69a  
VEINPTIIKQVRKLRMRCNLQTGASVDVIDKSVKNRILPTDPEIKCFLYCMFDMFGLIDSQNMHLEALL  
EVLPEEIHKTINGLVSSCGTQKGKDGCDTAYETVKCYIAVNGKFIWEEIIVLLG  
>DmelOBP76a  
MTMEQFLTSLDMIRSGCAPKFKLKTEDLDRLRVGDFNFPPSQDLMCYTKCVSLMAGTVNKKGEFNA  
PKALAQPLPHLVPPPEMMEMSRKSVEACRDTHKQFKESCERVYQTAKCFSENADGQFMWP  
>DmelOBP83b  
QEPRRDGEWPPPAIKLGKHFHDICAPKTGVTDEAIKEFSQGQIHEDEALKCYMNCLFHEFEVDDNG  
DVHMEKVLNAIPGEKLRNIMMEASKGCIHPEGDTLCHKAWWFHQCWKKADPVHYFLV  
>DmelOBP83g  
KFLDKDHADAEKAFEECREDYYVPDDIYEKYLNYEFPahrRTSCFVKCFLEKLELFSEKKGFDERAMIAQ  
FTSKSSKDLSTVQHGLEKCIDHNEAESDVCTWANRVFSCWLPINRHVVRKVFA  
>DmelOBP84a  
LQDHAKDNGDIFIINYDSFDGDVDDISTTTSAPREADYVDFDEVNRNCNASFITSMTNVLQFNNTGD  
LPDDKDKVTSMCYFHCFFEKSGLMTDYKLNTDLVRKYVWPATGDSVEACEAEGKDETNAACMRGYAI  
VKCVFTRALTDARNKPTV  
>DmelOBP99a  
ADYVVKNRHDMLAYRDECVKELAVPVDLVEKYQKWEYPNDAKTQCYIKCVFTKWGLFDVQSGFNV  
ENIHQQVLVGNHADHNEAFHASLAACVDKNEQGSNACEWAYRGATCLLENLAQIQKSLAPKA  
>DmelOBP99b  
DHHHHHHHDYVVKTHEDLTNYRTQCVEKVHASEELVEKYKKWQYPDDAVTHCYLECIFQKFGFYDTE  
HGFDVHKIHIQLAGPGVEVHESDEVHQIAHCAETHSKEGDSKSKAYHAGMCFMNSNLQLVQHSV  
KV  
>LmigOBP1  
MWARLNDCAALLLLAAAAAWDVNMKLTGRIMDAAKEVDHTCRSSTGVPRDMLHRYAEGQTVD  
DDDFKCYLKCIMVEFNLSDDGVFVLEEELENVPEIKEEGHRVVHSCKHINHDEACETAYQIHQCYK  
QSDPELYSLVVRAFDATIGD  
>LmigOBP2  
EMTPEFMEIVNKCKTEHEPTEDELKGMMALKVPESANGKCFMGCVLQEIGVVKDGGKFDKEEAKKHA  
ASKMTDKDELEKHMQLIEKCSQEVGGETDSCGIGPKLMCEIKQFAPEFDIALPQQPSE  
>LmigOBP3  
DAEKMKEAVDKCKASENLDSLGLKSSKSPSTEEKCFIGCLMMDMKLLSSDGQYDAASTKDMINN  
CEYLKDKPDEKSVALEVADDCAAGKATGCSGHCECGPKAVGCLIKGMVDKGYEESFARIDKMLEKLDD  
>LmigOBP4  
MGTAVAAAVLLLAVANAEDSLMEIVIREVKGCMDSHLNSIADLRSYNEAKSPEEKCFGLGCMLEKFK  
ALDADGQYDAEGLKATIQHCPRMKAHPNIQQAALQVADECAGKVTGCSDYCTCAPLATRCLHEG  
MKNKSFQTIFIALDEALDKMQS  
>LmigOBP5  
MALAARVFSATLMLTAVLFGDISTAGEVFTMSQLKAAVNECNDTYFLSQKNWDTVFTTGSLEDENDL  
VAKCFFECVLEKTGAMDEKGNINSITKAVFLASHEGTGTAVQGHDDLIDMCVPGRDETDCIRGYA  
LVKCVTVEELSRRQARK  
>LmigOBP6  
QLLLVSLALCLSAAVAQAPWCPTTASQGVQEDMGQCAEEIKDAILREYAKTVSSRRTRSAEMSEE

DRLLVGC MV SCLFRKGPHSRLQTGSKLLLAELGAMRLFSDGADDARYRNATATAVRRCSASSRSLLP  
DDGGPRHECELGFFMFECVSDQITEYCQWQPE

>LmigOBP7

AAETKVM EGIKACMASEHLGSLGQLKANNEARTPEEKCFVGCVMKHLHVLNSEGQYDLALVKERAN  
NCP ELAKDPQKKADTLRVAEDCAAKVIGCSGYCECGVAAGECLAQGMEAKGHETIYDFLRKIVDKM  
DV

>LmigOBP8

AVRLLLLLP LLLLALSCVTAAPSITSTEMRMDMMVIQHCNETHPVALIDMNKALINKKIEPQNTVFKC  
FVFCLLNKYEWMDDEGGFLIANMKHNLSDSHLDQLSIDFIVYKCSATGSSDKCERAYRFTECFWGEVT  
KFPENSDEKYEDPDLFALYQ

>LmigOBP9

TDATAAMD KASSAAVTACLLIAVAALHTQALSLEQLRQTSKIVRNMCLKKTGVDLALVEGIQEGQ  
FPDNQDLKCYMKCCMGAMQVLRQGRYNVNAAKNQADKMLPPDLKGRFIDMLDACSDRGDGDV  
DDCEMAYQLTKCSYETDKEIFLP

>LmigOBP10

AISEMSRAEEAASKIDIPELFEECNETFTIPKVT LNYFFSHGRLQNENDYGSKCFVHCLTDRSGEIDSDG  
NFDVDLIKVMTRRFPNETNIEGLNEMVETCVADRGETDFCERAYGLVSCLVKEKLARLGNSH

>LmigOBP11

VATMRSLLPVAVSAVLLVAPSKTLEPDFTKGISDVKACMASENLDSL DALRTNKEARTAEKCFIGCIM  
KFVEVLNSDGQYDVALFKDHINGCPEMAKDQQKKAALLEVAESCAGKASACSGHCECGVIVANCL

>LmigOBP12

AVILTAASTLWFAAAFAAMVTTEIPTEDILQRVQVCNKTPVSQEMLRSLASTGGLLSDESDVNTRC  
YLECYERLGGTVNKDGKFNPEKAVTLLVSYPKIAELGVDSVTEILKNCNSKSGTGQCMTSYLIRNCFIA  
GLNAKSPHTSVFDTSSSHI

>LmigOBP13

CDPRHDTATMSALFTCCVAAWLLLAALLQPTKGDDVWHNTDIPATMAECNATFRLGWRCWDNL  
LSDGHVIDESKYQQKCWFYCLLDET GSMHADGAFDKDLLKTVLQGFPNGSSLAHLDETTYTCVAQR  
NEVDLCERAYAVVKCIMTEELSRMHQSS

>LmigOBP14

MCLVLLFGFVQSL SLLFVPDSCLLL FVVVMFYFPCKISQANGSFVMTMLCLEQTCKMMDQLHQTCV  
GESGVSEGNIDAARKGNFIDG NLKCYMKCIFVQMTCMSDDGVFDADTAIAML PDNLKDVASKAL  
NACKGEKGS DACDTAFKINQCLFKQAPKDYILV

>LmigOBP15

MFYFYAFTFCLLWMLFHCSVNCVNVDIETIWRECNETFPASEEALISFGKNGTIPDENDSVARCFTD  
CYGKKTTLLTSDGSLNWTTLDFLMRSYDMKPTAKETFGKCQKNTSNVECMKSYLSLRCVAETVESLTD  
IR

>LmigOBP16

MNWGLWLPVTIALVLQLSISEALKCHTDEDTQNPDEFQEVAAMCMKNTSGSELNRNDRESKRNGN  
NYHKTNFENTNDNWNSSGGMGQTFPGYNSENEG YGFRGSGRCNANGDGYNGNRNNMNQNNM  
NGMRQRPRNRNRRSGQQSETADVDLEDIEPCAVHCIFRQMGM LGDDAIPDRSAVAKVMLRGVKD  
TEVKDFVQEAVEDCFDQVESDRKGS KCEFSKNVALCLRQKGRENCEDWGEQDGDQQSNQNKNG  
NNNGNYSNNSNQYGNKKWN

>LmigOBP17

MKAFQICTLICAVVAHCMCDKEEAMKILRASVDKCSAGYGLSRETTQYIVRHNFTIKDENDENQRCFV



QCVGQEMGDFNSEGIFDVDHATETAEKWLEWNGRTKSNLREEMEECAKITGTGTCMTTYLITKCAM  
KAGE

>SexiGOBP1

MLFLLRALPLLA AVLPLRADVNVMKDVTLGFGQALDKCRQESQLTEEKMEEFFHFWRDDFKFEHREL  
GCAIQCMSRHYNLLTDSSRMHHDNTEQFIKSPNGEVLARQMVELIHSCEKQYDHEDDHCWRILHV  
ADCFKQGC VQ RGIAPSMEMMMTEFIMEAEAR

>SexiGOBP2

MTSKCCLLLVAMATITAEVMGTAEVMSHVTAHFGKALEECREESGLSAEVLEEFQHFWRDFEVVHR  
ELGCAIICMSNKFSLQDDTRMHHVNMHDYVKGFPNGHVLSEKLVELIHNCEKQFDSMTDDCERVV  
KVAACFKVDAKAAGIAPEVAMIEAVMEKY

>SexiPBP1

MAFCRSATMSVRVALVVAASMLVVVQASQDVMKNLAINFAKPLDDCKKEMDLPDSVTTFYNFW  
KEGYELTNRQTGCAILCLSSKLEILDQELNLHHGRAQEFAMKHGADETMAKQIVDMIHTCAQSTPDV  
AADPCMKT LNVA KCFKLKIHELNWAPSMELIVGEVLAEV

>SexiPBP2

MAGAKWWFVCVVFALYLTSAALGSQELMMKMTKGFTKVDDCKAELNAGEHIMQDMYNYWRED  
YQLINRD LGCMILCMAKKDLMEDQKMHHGKTEEFAKSHGADDEVAKKLVSIHECEQQHAGIADD  
CMRVLEISKCFRTKIHELKWAPNMEVIMEEVM TAV

>SexiPBP3

MGSHNVFVALVLLAVGMRVAEPSKDAMKYITSGFVKVLEECKQELNMNDHIIADLFHFWKLEYALLS  
RDTGCVIICMSKKLLDANGRMHHGNAQEFAKRHGAGDDVASKIVQIIHDCEKKHERDDDECLRV  
LEVAKCFRTGIHDLDWQPKVEVIVSEVLTEI

>SexiPBP4

NFWKEGYEFTNRQTGCAILCLSSKLELLDQEMKLHHGKAQEFAKKHGADDAMAKQLVDLIHGCSRS  
TPDVTDDPCM KALNVA KCFKAKIHELNWAPSM DLVVGEVLAEV

>SexiOBP1

MKRSLCALVVVSAVLKLASGYEEPSYTRDKRSPPREGKDLGIFHPYQDLIPRHCWSRPKNVDMYKCC  
PIPQLYSDEVLDICGIEKIKEDEESPTKRSPTKLACKDGMCLMKESNLLDKDDRVDYEKL RAYLDQWAE  
EHPNFTEAILEAKKQCAYPDQGQEKDKAECEPDQIFVCLTAFIIWHCKFIDEPECKELQAHVDECRPYQ  
KPKEQDKKMAKKGKKFRS

>SexiOBP2

MITSSSILVLAALVQVLFAQQPDFQSGPPGPPGPHHKGPPGAFPPGIPKSCWVPPREVNLFKCCPIP  
PLYSDEVMQSCGFEPSEDGPKPPKRHRPDGTCKEGYCVMGNADLLQTNNSDYEFKRSYLDNW  
AASNPDFAEAIQIAKEDCAQDGGPAGPPVCEPDRLFFCLTSKIFWNCKLRDEGQCALQQHMDECR  
QYYTKPKEQIEGNAERR

>SexiOBP3

MLSMKT VIALVGLLLYEAGSVLGKNEDSVLRVISSSIGDTVLECGEMDFKDEVIHNF MNFWNR TNSL  
GTKDLGCALVCVFEKNAFLSPDGNTVLSNNVRQFLRASGADELSLRTLDFEMCKNEVKQVINRCD  
NALELGKCFRYGIFQLHWNPEPHYWTRKEEPSKIPKQVTELQKAPRPLSRKPVPAWRRRTDLRRIVGY  
VNRNCH

>SexiOBP4

MLKLCVFLALS FVACHGAPNKASGTFCGVTPNNMFKCLNNPRVLNLEAAAKCTSQVTECEKITCVFR  
EQKWSKRGVIDKAKIRAHFEQYETEHPWAQAVQHVKAFCLAPELRAQGVLNCPAYDIMQCALAS  
FIKHASPSVWSTEQNCDYPKAYAADCPCVPCSDCYSAAPIGSCNACYLQPRTV

>SexiOBP5

MFSHILHHALKLHMFYLFYLNKSSFFLSKLFLSYLTLSISFQSLSDREKSAIQKELTSVGLQCIQQHPLSLS  
DIRSFRNKMIPDGKKPKCFVACLFKKIGVMDDMGISMIPKAQENAKKVFKDNEEYIKNVNEIMEKCS  
SVNQNTSDGNKGCDRAKLAFNCFTENADKVSYLE

>SexiOBP6

MKEGNRYSHERRITNDSGDQLMVINATDDDYSGYGSGNMGEKLLTSVPRPASSNNNINKNNTRRT  
RRNEPLLNRPSDQCLSQC VFANLQVVD SRGIPREAE LWNKVQTSVTSQQSRSALHDQIRACFQEL  
QSEADNGCSYSNKLRLMLRFSDRKVDGKGNPKKSSTEQT

>SexiOBP7

MTRVLLAIGLTVITFALTQSANTKTSAMPKEAMTTTTMSDQDSSVDNNVDVDVIAVMNACNESYRIE  
MAYLESLNESGSFIDENDKTPKCFIRCVFENVGIVSEDGMQLNPARAAVIFAGQRNGKPMDDIGDMT  
ALCAADRQETPCDRAYKFIRCLMSMEIEREYS

>SexiOBP8

MSKFTFLVLCVAVSLSKVYASDEDKAKLHEALKPLVEECMKEHEVSLDDLKAAKEAQSADGVKPCFL  
ACVYKKAEVLSNKGFEADHALDKLKEFVSDVDLAKVAEVGNTCKAVNDKAVGDGDAGCERAALL  
TACFLEHKA EVKPIRPLLFPWGH HHHH

>SexiOBP9

MARRQRGAMFTETLPLFVILVAVTHGGKDKPVFSDEIKEIIQTVHDECVAKTGVAEEDITNCENGIFKE  
DAKLKCYMFCLLEEASLVDDDDTVDYDMLVSLIPDEYYERTTKMIFACKHLDTPDKDRCQRAFEVHKC  
SYEKDPDLYFLF

>SexiOBP10

MSRFGVLSFVVLIFCMGNIYALSPEEELSIKEALHPFVVECAEEYGMTEEMFEEAKKKGSAEDIDPCFMS  
CFLKKTGFFDDAGKFDAEKSISFAKEHITSESAIFLVAGAGECVQINDEDVSDGDKGCDRAKLLFDCLT  
DLKKKLSE

>SexiOBP11

MCKFSVFLYSAVMAVNIWSASCLSEEDKAAIITAIPLAQNCGSECGLDNDDFEYKEDGSDMDPC  
FKACLMTQMGVLDKEGKYDGKGLHKAMEEADYPGDKDDAQKFLDELDRCFDAKGDNSGSDEEAK  
MKRADVLFQCMQDMKEN

>SexiOBP12

MFRFLVAVCVAVVAVNGLSQELKEKFMERLETVGGECAA EVGANEDDIAELIAHKMPSRHEGECMIF  
CFYKHFDMMHADGSLHAEGA IKMMEPLKADDPDLYEKLMTIGKACAEVSSLDDKCKYATLLAQCG  
VKKGKEMGLDESLFE

>SexiOBP13

MSKFTCFVLCVLAVSLAEVRSNALEKAAIRAALYPLIVDCAKEHSVTLEQLKAAKAAHSAQGINPCFQS  
CVYKKTGIFNDNGEYDIANA KTLQKFVTDEDEYARIAEVGKTCASVNDKSVSDGAAGCERAALLTAC  
FLEHRAQIII

>SexiOBP14

MLGSLLFVFAFSVFSLSAEALLIDDLKQKYVDSILQCSQQYPLDRADAELLQNKVMPDKESTKCLFACV  
YKVTGVMSDQGELSVEGVNALSQKYLADDPEKLLKSEEFTEACRTVNDAPVSDGARGCDRAALIFKC  
TIEKSPDFSFV

>SexiOBP15

MSKFTCLLLCVAVSLSKVHATEEEKEAIRAAVRPIMEACGKEHGVTLDDLKAAKAAHSADGIKPCFQ  
SCVYKKAGIFNDNGEYDIANA KTLQKFVTNDEEYARIAAVGKTCASVNDKPVTDGAAGCDRAALLT  
ACFLEHRAQIII

>SexiOBP16

MSKFTCLVLCIVAASLSQAYASEEEKA AFREAIKPIVEECSKEHGVSHDELKSAKDNQNADNIKPCFLG  
CVYKKA EVFNSKGEYD VDKALEKLK FVSNDEAYAKFAEVGKKCASVNDKAVSDGDAGCERGALLTA  
CFLEHKA EVPL

>SexiOBP17

MSVVRYSSFVMALFCLVSVNAMSGDEEAGVRDALRPYVQECAD EYGITEEQFEEAKKKASADDIDPC  
FMSCFLKKA EFFDAQGKFDVDSTMAFAKEHLSSEPAMKFVEAVGDECVKINDEDVSDGDKGCDRAK  
LLFD CIAETKKKMD

>SexiOBP18

MSKFTCLVLCVVAVSLSGVHATAEEKA AFIEAVKPYIQECSKEHGVTPEDIKSAKEAGNADGINACFLR  
CVYNKAGVINDKGEYDADKALEKLK FVSNEDDYAKFAEIGKKCASVNEKSVSDGEAGCERAALLTSC  
FLEHKSEVHA

>SexiOBP19

MTSSSVVWCAVICISTVFAWYDEPYNKKGFDECIEKFHVQPREKGSFQKPDISSVDPCFWACGFKILG  
FLDSEGQYDLETTSHYKKENLSYLGEKQE KVEEIEQCDAALEKITGTDPKAECDRGFQLAKCYVEDM  
RKLLFEDSRK

>SexiOBP20

KFLFLVACALVAVNAVSEQLKNEFIEKMTNIGGQCAKEVGANEEDIAELLAHKAPSRHEGECMIFCFH  
KHLGLMNEDGTFSKEGGLKALEPVKADDPKLYEKLVSIGKMCQEEVAKDDDKCKYATQLTVCGVKKG  
KEMGLDASMI

>SexiOBP21

MSYINYFLFSVVLFCNNNSFVYSMTREQIKNSGKLIKTCSAKNDLTEDEVKD VDKGKFIEKKDFMCYI  
ACVYKMGQSVKGSTINHDMMLRQVDMFMFPNDMKAPVKAAIEHCRPVAKNYKDLCEASYWTAKCI  
YDFDPANFMFP

>SexiOBP22

MKTYTFR LFCYIFCISLFLGQSYGMTRQQLKNSGKLMKKSCMPKNDVTEEEVGDIEKGKFIENRNVMC  
YIACVYTMSQVVKNNKLSYEAVIKQVDVMFPAEMRDAVKAAASYCKDTTKKYKDLCESSYWTAKCM  
YDYDAENFVFP

>SexiOBP23

MMDRKRCLFLIAMIYAQGS DAMSRQQLKNSGKMLKKNCMSKNQVTE DQIGSIEKGKFVEDKKVM  
CYIACIFEMTNVIKNNKLN YDSSIKQIDLMYPPELKESAKAAAECKDVQKKYKDICEASYWTAKCLYD  
FKPEDFIFA

>SexiOBP24

MQINQLLG LLVIATCVGISHGMSRAQVKKTMSLVKNQCM PKNSVTEDQVGKIEEGVFLED RNVMCY  
VACIYKNLQVVKNDKLD MGLITQIDALYPPELKEPVKKAVSLCIHSQDN YNDLCEKVFHASKCLYEK  
DPASFIFP

>SexiOBP25

PTFTYLLNTELQARTDQEIKAWFFREGMDCNNEHPLSPKEMLELKENKIPDTNSAKCFVACVF KKTGM  
LDSKGMFDAESSIAMTQKDFVDDPKKLESSKLL EACKKVND EAVSDGEKGCDRSVLLHKCFVETAP  
QLGIKLP

>SexiOBP26

MKVFVLLVLSAYILIENEAAMTDAQLKAALKLLRNVCQPKNKATNEQIEAMHKG DWNQDKNGMCY  
MHCVLNMYKLIKDN TL DYEVMSTIEAQAPDSIKATAIHSLSNCKDAAKTTS DKCIAAFEIAHCLYLD  
NPPAYFLP

>SexiOBP27

MLLTkIIFLILVATCEAMTMKQIRNTGKMMRKCQPKNNVEDEKIDPIAEGVFIDEKEVKCYMACIMK  
MANTIKNGKLNyDAAIKQADLLPDDIKEPAKEAITACKKVADAHKDICDASFHITKCIYNHNPGIFYFP

>SexiOBP28

MKTFVVLAAACVMLAQASGLTDEQKEKLKKHRSECLTETKVDEQLVNKLKGGDYKTESEPLKKYALCM  
MMKSELMTKDgKfKdVALAKVPNAADKPTVEKLIDACLANKGNTPHQTAWNYVKCYHEKDPKHA  
IFL

>SexiOBP29

MFFVQAIStyStilVLFMVtSHVRTDSSEEEELMVKCMEEASVTKEEVKVFRtDKISDKILCFMKCRFES  
GMFDENGVIIEMLQEGYDDFGWNDEQKIKADECIDNMKPAKECGDLADFFSCLPVINYGELIK

>SexiOBP30

MNYAIFFFLVAILSNASGMDDDMQELINNLHNTCVGEVGVDEALITKAQNGDFAEDEKLMCYSKCLL  
DQMAIVDENGIVDPEAAVAVLPADMQAEAGPAVRKCSKLRGSSPCSNVFEVMKCWYTESPATYFLP

>SexiOBP31

MKFLVVAACVLLTVQALTDEQREKLKEHSTACAKSTGVDPEAIANAKKGTFSDDKFKDYLCVSKKIG  
FQNEAGEIQKDVVKQKATVALKDEKLVDIIKKCAVVKDTPQNTAFEVAKCYENNNAKHSSLV

>SexiOBP32

MKSLVVFCIVLVVGVCANeKGNKLASECIKETGVKNELLEeAKKGIISEDPAFKaFTYCFfKIGIVGEDGI  
LNRDVAIAKLPSGVdKSEAEKLLDSCSKTGKDAVDTVFEIFKCYQQGtKSHIMFAS

>SexiOBP33

FTCIILCVVAASLTkVSHAVTEEEKEAFREAMAPIIAECSEEHGVSEADIKAAKEAASADGIKPCFLGCVM  
KKIEVLDSKGLYDAETGLGKLKfVKDEDEFaKFEDIAKKCLKVNDESVSDGEAGCD

>SexiOBP34

IAETKKKCLSDedKKILRDGLDSIAHDCLHGCGIDEKELDNLDANDSIECFKKCFMTDAGFLDLNGKYN  
KDVLSesLSKVTGNQDNaERILNELDRcFTENGDNSEANEEAFMKRIDILfACMREIRE

>SexiOBP35

SLKVLSVFVALIVALHADDdHEKHfFAMfKECAEENGLKMDGfKRGERPVGPPSNEMMCTVKTMEK  
EGILSGGKILIEEFKDPKLTKHVPADKMDAALECLKGVEVSDCSDMKKVMDCThDMKF

>SexiOBP36

EHTMPAQRRRDkREVPFTHDEKRIAGCLLQCVYRKVKAVDGYGFPTLEGLVGLYSDGVNERGYFMA  
VLEASRECLMKNHDKFSRTVPMdNGRNCDVSFDIFECISDRIGEYCGTSGL

>SexiOBP37

QKAQIHAFfESVGMECNKGSNMITADDIASLRAKKIPAGPNAPCFLACLLKHIGIMDDSGLLQKETAL  
EMAKSVFQDPEELKQIEDYLHSCSGVNAESVSDGAAGCERAMLAYKCMT

>SexiOBP38

MAELARMVRENCAGETGVDVALVEQVNAGAEMLPDDKLKYIKCTMETAGMMADGEVDIEAVLAL  
LPPSLAEHNAPALKACGTQRGADHCDTAfRTQQCWQNANRADYFLI

>SexiOBP39

DKIAIMSAMKPIVDECAKKHGVTLEALLAAKASGKIDGIEPCfYSCVYKKTEFLNSKGEYDVdNSLVKLK  
KYISSDDDYAKfSQIGKdCA

>TcasOBP1

MILKASIFLILAVATFGAILEDSELmKVVENCVKKTNANESEfSSPNfLETTPSQPALCTAKCLLESLEIVN  
SEGNINMETLKEYAQPFESPAReAVATCGEEIKSVTTCDdMEKYRKcVEPLIKNS

>TcasOBP2

MNPITSVILTFLFVFSFGEKESEELQQIFTELDGPAAELRDQCLEKNSMKVTDLKYNTSNDIPEKELCF  
YKCFYEGVEFIDANGNLNVNNMKEIPAISELGDEVLEITACVEKIGKIRCCGDLRKIEQCYQNITM

>TcasOBP3

MWSFVTLFLSFLVLAQAQKKGKYWTTISECLTEHSMGVEDMKKFDLPAEKMSEEMLCFNKCFYDKLLI  
TDENGEINTDNLMSIPLVNAIDASKHDDLVTCLKKVGKIEECDGVKKIEQCFVEFI

>TcasOBP4

MCRLFVVLSLFVASQALDVEKIRNELMADKNFVELRNKCLDKLGLKEEDLRDLKFDGDVSEDLMCFGK  
CIQEEDGLLDSEGNLNEEKLEKKIETMPFLSRVSDDTKNNIMECLKEIGKIETCQDFGKQRDCIHKYV

>TcasOBP5

MAKKQLVLFFLAFIFLQSSWAYFFMSQKFAEVREECLSENSMTMDELHEGWKMMENLPESHLCFLKCLL  
EKREVIDENGVPQKEKIDEILTVKQLSDEKREEISTCITNVEKIENCETMSEIMRCFPKKRRD

>TcasOBP6

MSPLLLIFISCLFPRVFGISEEMQELANTLHATCVDETGVSEDAIESARKGNFAPDDKLKCYMKCIMEQ  
MACIDDEGIIDVEATIAVLPEEYQAKAEPIVRKCGTKIGANACDNAFLTNKCWYEEDPEDYFLV

>TcasOBP7

MYKTRVIYVLFALCLVEIFAEMDDDMKELINNLHNTCTGETGATDDQIENARKGNFAEDDSFKCYFK  
CVFDQMGCMTDDGKVDSEAVIAMPPELADKIASTVRGCTEVGANPCETAWLANKCYQKSNPDM  
YFVP

>TcasOBP8

MIRYYIVLLLYFFAPPVLGISEEMQELVNQLHSTCVAETGVSEDLINKVNSDKVMIDDEKLKCYIKCLLTE  
TGCISDDGVVDVEATIALLPEDMKAKTTPVIRSCGAKMGANPCESAWLTHKCYLETSPADYVLI

>TcasOBP9

MKAIIIIIVATLSFYHVYCAMSEAMKAALKLVRNVCQPKTKATNEQIEAMHTGNWDLKNGKCY  
MWCILNMYKLIGKDNSFDWEAGIATLKAQAPESVRDPAIASVNNCKDAVKTTSKCEAAEYIAHCM  
YLDNPEKYFLP

>TcasOBP10

MKTVAVLLFLALAACTKQEDDDRQETIRQYRDDCIAETKVDPALIDRADNGDFTDDAKLQCFSKCFY  
QKAGFVSETGDLDFVIKDKIPKEANREKALAIIDKCKELKGADSCETVYLVHKCYFLHSYGTDKKTE

>TcasOBP11

MSFLILLICVIPAIFCRSFSHDELDTLSFIKTCNRTSPISMRTMNEVLINKKLGHGESSAFKCFHLCLFMK  
YGWMDSDGGFLLHDIKQTLSESDVEIASLEFILYKCTATESNNRCERAFVFTQCFWDKMAEQQPSD  
QFFYNIEDKK

>TcasOBP12

MKLLITLATLVVATYIDKEFVQELRQKLRSHEACAKEVNAGPDDVSAIFAHKLPAHEGKCIFFCMH  
KLYNAQNEDGSLNMAGALANLELIKMDPDVYTKVSTSFKNCESAPFSDPCLYAANLVTIVKEGR  
AVGLDEVLVE

>TcasOBP13

MKFLVLFLSVAILCTFAMDESFLQQTRDRVKAIVKECVTEEKATDSDFDDIMALKIPTSHEGKCVFFCSH  
KKFNMQHPDGSINKEGALDTFEVVKDVEDAEFHDKVITVYNHCLSTPVPDPVYSVNLFQCFMKEA  
KAAGIHELIIK

>TcasOBP14

MNSVLFLVLCALVACSGELDKEFLMQFLQKIKKVSIEDCIAETQATKNDIKTLLEHKIPDSHEGKCMIFCF  
HKHFQIQNEDGSLNKVAAISLLEPIKDHSDIYDKVVKIFNTCFDSAERDDSDCIYASNLAECAIRESKS  
LGLDDLIVIE

>TcasOBP15

MNCFVIFALSLSATVFGQSLSEDEMRENARKLMTSCKDKVGASDADVEALKMHQMPESREGFCMLE  
CVFDSAKIMQDGKFSKSGMIEGFKPLIGDDKAKLESLEKLSATCESELGDGEDKCETAKRLVECVIKNGK  
THGFEVPPPRE

>TcasOBP16

MQLLVVVLAVCVLGANAGLDPKFLEKLTQEVQAVGTSCGEKEHATADDMIEIMEEKFPPTSHEAKCV  
VACFYKHYKMMKEDGTFDKDAAVKAFDEIKAQDAEIHAKILKVIDACDAKKQMSDDHCVSAASMA  
GCVKTEAIANGLTKEAFMAS

>TcasOBP17

MKSTWFFLLACSLTCALDQEFVDEFLEKMQEFGAQCAEETDATSDDIAELIARKLPPSTHEGKCMIFC  
MQKKFNMMKENGIDRAGAIAALKPLQKADPELHQVKLKFVTCGMRVKPSPDPCDTATELALCGK  
KEAEAIGLEDALLT

>TcasOBP18

MKLFILAGILFTGVCAVDQEFVEKFLQKMEKIGEECAEETHATSDDIADLIEQRDPKTHEGKCLIFCYHK  
KFNTMKEDGSLDKVGSVLALEEVRDADFELYKNILTIFVTCGDKAKIYDDPCETATALTMCGRDEAKAL  
GLQDAIFG

>TcasOBP19

MKYFVVFASLFLATNALSQDFIDKFVAKVKSIGETCVPETNASKDDISSLLAHKMPDSHEGKCLIFCFHK  
QFQIQNDGSGINREGAIKALEPLKADDAELYEKVISIFKKCESTPVDGDSCLYAASLAECAVKEGRAMG  
LDNLIVLEIE

>TcasOBP20

MATRFCFGLLILFVGTVLVFAENEHEILEVRALCMNETGVSEETARNYKPAEDPASEEILCMVKCIFEKIG  
CLKDDGSFCVDTMKKKNYIMDVINEENEEKIYECLRGVGKITNCRDMAAVEECFVKNSDK

>TcasOBP21

MLRLVSLCLFLLVQGENLDMFDPAGLQACMKKLSVGETELAKALEDKSKDPPEKIMCLFKCALED SG  
FLQDGVVDKSKWPMPECVQDVVKITNCNDMVALKHCFD

>TcasOBP22

MKPIFAIITLTCTTVHALDCGIHINKNDALKATINKCLISNKTLEDLWDMAPMSSESDDSSSEEVPPVDG  
KMLQNFRIKRASVRLTNTETNETTPEPKAVSSEAQATENCIIQCIFDNLQMTDSTGYPVHTKILDGLLK  
NTTNRELRLDFLQD TTDECFQVMDKEDTMDPCSYSNKLVTCLAEKGRSNCADWPVGELPFKP

>TcasOBP23

MKYFPHLCLCLIFFELSEAAMSEAQLKAAVKLVRNMCQPKSKATNEDIEKMHHGDWNIDRTAMCYM  
HCALNSNKLITKENVFNRDYAITLAEKNLPTALKTASIEAANLCKDSAKTLDDKCVAAYEISKCLYESNP  
EKYFLP

>TcasOBP24

MSRMLPAALFVVLATLTFATAEIVVPDDLKDYINELHDHCLKEMGLTEGDHKNYNIHVDPKMMCY  
MKCLMTTSKWMNMDESIQYDFILSSVHPAVKNILLPALDKCRDIPKGTMECEKAYNFMCLFNADP  
ENWFFI

>TcasOBP25

MPLKNLIILIVCPLFVFAKVDIPPDQLAEIDGYDYICYKQIGLTKDDLKAYKIGDRDPKIMCFMKCVFEA  
KWMDENENLQYDIKNTIHH SIRHITLPELENCGKKAEGDKCEKSFSFFNCMNKAEPEDWVLIQ

>TcasOBP26

MMHLKNFVVLVVCPLFVFAKVEIPPDLEAEIDEYFEQCFEPNGVTMDDIKAYKMGDKDPKIMCFMRC  
LFVSGKWMDENENMQYDIKETIHHAIRHITIPELENCGKEAQTGDKCEKSFNFFMCMNRAEPEDWI

LDYKS

>ApisCSP1

MNLLAIFCYITMMCDSQFRRLEQMTAMPQVKQPATIATRIGQATIAPRFGQPTIAPRFGQATVAPQV  
GQAAVTPQIGQAAIGSRIGQSFQSVNGSVTPTTDGRKTTRETASYPTRYDFIDIEAVMNNDRIIKILFN  
CVMNQGPCTREGLELKRVDPDAIQTECAKCNERQRKQAGKVLHLLQYKPEYWNMLVKKFDPNNIY  
LRKYMADNDDDEKLSLQKLTNNTTK

>ApisCSP2

MAHLNLFVVLVASLVCFTLAEKYTTKFDNFDVEKVLNNDRIILTSYIKCLLDQGNCTNEGRELKRVLPD  
ALKTDCSKCTDVQKDRSERVIKFLIKNRSAEFDKLTAKYDPSGEYKKKIEKFDAERAAAAKH

>ApisCSP3

MVHLNLFVVLVASLVCFTLAEKYTTKFDNFDVEKVLNNDRIILTSYIECLLDQGNCTNEGRELKRVLPD  
ALKTDCSKCTDVQKDRSERVIKFLIKNRSAEFDKLTAKYDPSGEYKKKLEKFS

>ApisCSP4

MDSRIALVCVVLAVFAVDQTVGAPQKDAASGPVYTTKYDNIDIDQILASKRLVNNYVQCLLDKKPCT  
PEGAELRKILPDALKTQCSKCNPGQKNAALKVVDRLQKDYDKEWKLLLDKWDPKREQFQKFQQFLV  
EEKKKGVVKF

>ApisCSP5

MNCKILIALCCVAVYAAQANPAGVATATAADEEIKDLPAYMKRFEKLNVEQVLNNDRVLASHLKCF  
NEGPCVQQSRDLKRVIPVIANNSCNGCTERQITTIKSLNFLRTKKPVEWARLVKIYDPSGVKLNKFLD  
A

>ApisCSP6

MNKLFLAVAFICVTMMTVVQTAPAKYTTKYDNVNIDDILNNDRLVNSYFKCLMETGKCTPEGEEIKR  
WLPEAIENKCEDCSEKQKLGSEKIKFLIEKKNMWWKQLEEKYDSKGLYRQRYSEDAKKLDIHI

>ApisCSP7

MARSSSVTMKVFVIAVCVCAALARPEEAKMENKPAVVKSETLAAPLPTTIVKRATPYVSTQQDSSL  
PNVSEDEVLDKALSDRRFVQRQLKCATGEGPCDPIGRKIKAHAPLVMRGMCVKCSQSEIKQIQRVMS  
HIQKNYPKEYTKMLKQYQSGF

>ApisCSP8

MTNNNMNCPRSRPEIFSLTVAIAAVLVHQPTTVYCADGGTYPQQQLQQQQQQQQQQQQQQQ  
QFTAPSGYYVSTYDHIDVGRLLRNQKVVSGYVKCFVNEGPCTPDGKLVKAYLLPEIIRTVCCKT  
EMARMVLRHIYTYRRADFDKIMQIYDTDGKKNEIINFMNQK

>ApisCSP9

MSSFCLNSVILMTVITVVVARVAFEAESTTSNDRPGSDIRLVKKDVEDYNEDDADDREEGFFRISHFFGF  
TSYDDDKPFDITFDLIRLLDEKYAMKQFYCVINEEPCDAVGLRLKATIPPEINRDCERCTATETSNIR  
RILNYVKKHYPKFWERVEPIYRNNTTA

>ApisCSP10

MVSKRFISVFMFMAVVGVSFSVPEDDDATKVVNKEVDHHSVIQEEIKFLSMMEKINIDQILNNDRL  
MSNNVKCFLNEGCTAQLREMKMLPVLIKDCSSCTKEQRNMIKKAMDAIKARRPNEYERVTKFFD  
PEKKYEKKLSEKLNES

>AmelCSP1

MRHNYIVILISLLTWTYAEELYSDKYDYVNIDEILANDRLRNQYYDCFIDAGSCLTPDSVFFKSHITEAF  
QTQCKKCTEIQKQNLDKLAEWFTTNEPEKWNHFVEIMIKKKDEGA

>AmelCSP2

MASAIKALLIVCALFIYTVTAETEEGQSGRSRVSEQLNMALSDQRYLRRQLKCALGEAPCDPVGRRL

KSLAPLVLRGACPQCSPEETRQIKKVLSHIQRTYPKEWSKIVQQYAGVS

>AmelCSP3

MKVSIICLVLMAAIVLVAARPDESYSKFDNINVDEILHSDRLLNNYFKCLMDEGRCTAEGNELKRVLP  
DALATDCKKCTDKQREVIKKVIKFLVENKPELWDSLANKYDPDKKYRVKFEEEAKKLGINV

>AmelCSP4

MKTILIALVPVCFLGGEVSEDKYTTKYDNVDIDVVLNTERLLNAYVNCLLDQGPCTPDAAELKRNLPD  
ALENECSPCSEKQKKIADKVVQFLIDNKPEIWWLLEAKYDPTGAYKQHLYLQNRVKEESY

>AmelCSP5

MKIKILLFFTILALINVKAQDDISKFLKDRPYVQKQLHCILDRGHCDVIGKKIKELLPEVLNNHCNRCTSR  
QIGIANTLIPFMQQNYPYEWQLILRRYKIMKYY

>AmelCSP6

MKIYILLFVLVTITCVIAEDYTTKYDDMDIDRILQNGRILTNYIKCMLDEGPCTNEGRELKKILPDALSTGC  
NKCNEKQKHTANKVVNYLTKRPKDWERLSAKYDSTGEYKKRYEHGLQFAKNN

>DmelCSPA75a

MKWLVIIVLLQLEKIKCEQSYEVTNERLEPFEGDSQTLVLFDDLKTIGRERALNGSFKFLGEMNNDDFK  
VSVELYSSPNGDGEFKRMVMDVPQTSICECFKKFYVQFVQPSLKTGETTNFPVDDDFCPVPEGEFYV  
KNVILNTQDWPSQVPRGIVKAITFFSGGKNVGGGLIVEVKIEDRQS

>DmelCSPB38c

MFATLLILLGSTDILATDYILLVEDPDIYTPCTDGPPGSVGLNEAFDVSEMQVEMDEEGIHVSGNITTR  
WSLPPTYRISARMSVLHFNRGNWEPTVFNTLTPDFCDAMFNPNLFWYKYWFKNFENREEIQEKCLAT  
QGTVLVYNPFVVVPRLNNVLGPTLKGRYKVVFLFEAFNEQDERQPSSVCFEITGDAEKIKN

>DmelCSPA87a

MGSSLCPVSYLAVLAIIVLTSNITVQAKRTFRIQKLEKVTEDTSYLSRLRIAEESEENELKVSGYLDLNQRL  
DNDWTVVLKVSRSPPSDSDGYEKVLTFFEMQLCDFMKSYYKDIFYERIKEYSNAPHSSCPLPKERYVLE  
DYPFNVKLLKKLMSPGFYRIKYTLKNEETKILSYVLDLELEN

>DmelCSPB93a

MGCETSVLCTLLIFFQIIGRSFEMSHDFVPIKDDLLSKCEDKPEMGYLDAFVDLSNFSRKRGPGGVNISG  
NITTIWDVDPSPDVVEIDVSILKFEGDKWIPTIIGKNVKDFCKSFYDKNTLYSSYSTKHVVNKKEAKECIT  
TPGAILLWEPYLLKISFSYAVPLNVGRHKAVLIFTAIDKAGVKRDRDICMEIVGDIVNA

>DmelCSPA98a

MDAKIIILALVSLFYKANGAFYELVADEEIFSSCPNPEPGTLDIHGLDFDFSEFSTSLEADGLTVSGNQTLV  
WDIQRGDRVQLFIKLFYFDRGTWTSTAFSILSQDFCKTMYDKSNVLYEPWTGHVMNDVKDQCINAP  
GTKLILDYFLSLSASVTPLREGRYKTIKFRAFDSKGTERTPSICCEVIGDVFKIRN

>DmelCSPB42a

MKATFTILVLQVVICLAGATEYQLTLDKDGLLAPCENQPGNPSGFEAMVDTSSLKVHNLGSKVRIEGE  
QKVWWKDVQPGDTLKVFGQVYRLDKGTWQKTMFTASSNNFCKNMFDKNQYWYNFWTKYISNSD  
EIKEKCLTTPGAVLKYKDYELDLKTSLNVPNLGGRYKLVVQIEAFDKRNVRRPVPICIEFRGTAGQV

>DmelCSPB93b

MDRQQVTLLNILISLTLQIISPSFALNHFFIPEREELFSECLDKPGFSYVNELADLSRFNRKKDADGAMNI  
SGNITMLWDVEPSNRVAVEVNIEKFEGGTWNPTLFKGGDKDFCKNFYDKNTIYYPFSTKHVINKQQV  
KDKCITTPGTVLVLEPFILKILINFAVPLSPGIHKAVIIFSAFDKSGVKRPRDTCIEIVGEIVNI

>DmelCSPA29a

MWHCELKVFLILWTVSQVYIPCWGKKFISRFESINGIEGEKETLFTCSVRLVGRERMLNGSIMHQVDLD  
DSFDVWMDILHFKNGEWAQGNIKVVRTKPCDWFTNYFGKYFLPLVKDSNLPPIQEMCVFPKGEYYLRI



TKIEPQNWPPILYRGLNQFNINYVRDGKSTGGIQFVIDLEDSTL

>DmelCSPB38b

MIRGLVILVLALANTWATDYNALIDDEGIYVKCEAPAGTLGPRDVFNIDNMVMHMEPEGIYVSGNM  
TVKLNFLPSDRISARFSVMHYERGSWQPTMFNLHSPNFCEVMFDEDQYWFKYWFRYIRNKEEIREKC  
LKVKDTVLVYDEFLMVLHLENVNTSNLQGRYKAVITLEAFDEHNVRRPSSLCVEIRGDLERV

>DmelCSPB38a

MISISTILALVSSVWATDYTFEDSDLYSECSEKLPGAIGLREAFDMRNIVTELDIDGLHLSGNCTTIW  
DVPSTDRISLRMTVMHFDRGTWQPTVFNTYARDFCAVMFDKELSWYKYWLKYFANREEISEKCIGTK  
GTVLVYKPFIVKPLIQNVIGPIYRGRVKAIFNFESFDKNNVKGATDVCFEVRGQVEKIK

>DmelCSPB42b

MIFVLLLLLGVTSWATDYELLLEDPDIFSTCTDGPPGSINIRQALNLDDIVIDQKGDILHVSGNATVWW  
DVQPTDRITARLDVFHFNRGTWEPTVFSMATQNFCSIMYDKNQYWYKYWTRFITNRHEVEKKCFRG  
PDTVLVHEPFDLILKFENFRGPLLRGRHKLVLFNALDERNIPRPNPICLEIIGEPLKLQ

>DmelCSPB42c

MRTLMLFVFGFASSWAADYELLLEDPDIFSPCTEPPPGSIGFHDAFDIGDLVVDQDMDIIHLSVTSI  
WDVEPTDRISARFAIMHYNRGSWEPTVFSMATPDFCASMFDENQSWFKYWKHISNRDEVMEKCF  
KTRGTVMHNPFDLQLRLDIRGATLRGRYKAVVTFEAVDEKDVPRRNSICFEIRGEAEKIN

>DmelCSPB53a

MLELILILNVVHLSLQISYEFEIEDESIYSDCSDVPPGTLNISGLFDLTNYTTTITADGLSVSGNMTSVFNA  
QPTDRIELTGNLLFFDRGAWQPTTLNMMVRDFCAVMYDKKQLWYTDWSSHVNRDEIKDNCIKVP  
GTLFLIESYNMMLVFGSGIPLGTGRYSIRVQVFAYDQKGKKRPNNVCYEVKGNFYKESNICISKPILITIN  
VLAESLKSQMSSTNHANI

>DmelCSPB53b

MSQQLFRIWQLLVLMAFIPHSIEVSYEFTMEDERITSDCQNEPPKTLNIDGLFDMSNIDFEMAEDGVQ  
LSGYKTVVWDIQPTDRVELQGSVQYFDRGTWQPTTLNMLVKDFCHVLFDKKQVWYDAYSKHITNS  
AQINNTCFRVKGSVIEFETYTIGLEFGSGIPLHRGRYAIRLKFRAFDKNGKVRPNEICFEIKGQFSKSLG

>DmelCSPA84a

MKQFLFCVLIIMLIGKTCALIPRTYETRFISITSNGTNLFDQSIRFLGRERMANGTFELKEDLDNESFSV  
GETFIDSVGDGEYKQLPFTAPKQSVCTALKAYWSYFEPSIKYGVKTDFAHTHPCPLPKGIYYIKDVVLK  
NDNWPVIMPRGYLKAVANLFKNDEYGGSLIVSQISDLS

>DmelCSPA86a

MLKYTVLVLLIGIPKLLLQAQMSYEAIFVSVTSEENSKPFDLSNLRIGRERILNGTFEILEDLDEHFQISV  
EIYTNPARDGNKLLPMSVPRQGVCTFFKKYGFYFRDCIKNGINTDLFLNTTSCLFPKGHYLKNVTIN  
VQNWPKIMQRGLCRHIAFFYKNNVPMGSYNLTSSIEDRAPNFNLRPL

>DmelCSPA56a

MSFWWMIQSLILWTVSVGSKKSNEYVRFESIDAVKGSTETFLYQLRLLGRNRMINGTLIFLEDLDET  
DVLFESHAFKNGYWVKGIVNAAASKPCEFFNRYISFFLVKSTESNLPTTGAEMCPFRKGTYFVKNGV  
VSTEDWPPIVFKGLNRFTISYLKNGECVGGVQLTISIAEIT

>DmelCSPA46a

MSLELHKVLLVLSIAHSALVRAGLECRISISKVFGDNETLFEFNFRVIGRQRLNGLTNFHVLDLDDYE  
MSNEVLALKDGEWESTSVSARFKTCKYMAVIYDKYFAVSFKDSNIPKGTEACPIKKGEYYARNVEVIAD  
NWAHYAKLGLVRSNMLVRKNNVVYGGFDIVLVLSQKIV

>DmelCSPB74a

MDFQFSVLCQILIFLTAAQPSIGGYFEYVLDDSVFSECFNTPPGYANVSGLFDVSTVNFEMGPEGVHI

DGHVTSTWDIQPTDRIEGRNLNVVHMDRGTWQPTVLNMVCKDFCKTFLDPNQYWYNVFPKHIINKD  
EARQKCLNYKGTVYFVEPYTLQMHFGLGLTLPSGRNRMVINLVAIDENNVTRPNGICFEVKGDFFKIE

>LmigCSP1

KYDNIDLDDILHNDRLKKYHECLVSSSDASCTPDGKELKAVIPDALTNECAKCNEKQKAGAEKVIKFL  
VKEKPDLEPLEKKYDPSGSFRQKYGPELKKVSA

>LmigCSP2

MQALTLVLFALVASAAAYTTKYDNIDLDEILNNERLLKKYHECLMSDSDASCTPDGKELKVSIPDALVT  
DCSKCNEKQKEGSNKVIRFLIQKKEDLWKPLQAKYDPEGTYLKKHPELLSA

>LmigCSP3

MKSCALALLLVGLVAAAAAYTTKYDNIDLDEILHNDRLLNKYHECLLSDTDTPTADGKELKAAIPDAL  
TNECAKCNEKQKNGAEKVIKFLIKEKPDWLTPLEKKYDPNGTYRQKYGEELKKVSS

>LmigCSP4

MQKCTLALLLACLVAATAAYTTKYDNIDLDDVLHNDRLKKYHECLLSDSDASCTPDGKELKAAIPDA  
LTNECAQCNEKQKAGAEKVIKFLIKEKPDLEPLEKKYDPTGSFRQKYDQELKRVSA

>LmigCSP5

MQKCTLALLLACLVAAAAAYTTKYDNIDLDDVLHNDRLKKYHECLLSDSDASCTPDGKELKAAIPDA  
LTNECAQCNEKQKAGAEKVIKFLIKEKPDWLTPLEKKYDPTGSFRQKYDQELKRVSA

>SexiCSP1

MRAVLFLCALVHVVGQDVNDMVNMPKYDQRYDYLDVDAIFANKRLVRNYVDCLINAVRCTPEGK  
ALKRILPEALRTKCVRCTERQKRTAVKVIKRLKNEYPDWSKLASRWDPTGDFTRYFEEFLAKEHYNTIP  
GSGSALPTSAPIAPPRVSPLPPSTTPTPGPTSTPLRPLVLNRFGDDGELMMGSPSSAGVTPRPMTQA  
TTRPSTTTKTPSTRPVPPRPTMMTWAGAASNTQSTRFPLRPVSEISPPYSTAITLIDQIGYKIIKTTELVT  
ILRNTVRAVVGR

>SexiCSP2

MQYIFRYGRDEGVTAQRRVERSREIRYKMKLIIVVALCLVAVAWAKPASTYTDKWDNINVDEILESQ  
RLKAYVDCLLDGRGCTPDGKALKETLPDALEHECSKCTEKQKKSSDKVIRHLVKNRPDLWQELSGKY  
DPENIQERYKNQLDAVKRQ

>SexiCSP3

MMKYIALAMMLLVYLTIQSNAVETSTYTTKYDGIDLDEILNNERLLTGYVNCLMDNGPCTADGKELKR  
NLPDAIENDCKKCTDRQREGADRVMHYLIDHRPEDWTKLEKKYNSDGSYKMKYLSRKAEDSKETNT  
TKSEEDTKNETKEFT

>SexiCSP4

MMQKSFITMILLMYLTIQSNATETSTYTTKYDGIDLDEILSNDRLLTGYVNCLMDIGPCTADGKELKKN  
LPDAIENDCKKCTERQREGADRVCHYLIDNKPEDWTKLEEKYKSDGSYRAKYLASKQTKDEKESNATK  
SSEDTNNVSKE

>SexiCSP5

MKNMIALFVWILFHSVLSEEPNKYTSMYDNIDLQEVVHNERLLKNYVNCLLEERCTPDGAELRRNLP  
DAVENDCKKCTQKQKEGADFMMQYLIDNKPEYWNLLQKKYDPSGSYRTKYLEAKNGAVQEEAKE  
SSEHHII

>SexiCSP7

MKYIAVVVLFVGLAYCRPDDGQYTTKYDNVDIDQILKSDRLINSYFKCLMTGDGCTPDGAELKKILP  
DAIETGCSKCSRKHKDGSKKIINHIIINKPDLWKQLEAKFDPQGTQKYKAELEKEGFKF

>SexiCSP8

MKFBVILLGLLVVYFWAFTEAEYKSQYDDLVDVDEILRSKRLKNYVDCLLDKGRCPPPAQELKEHLDDA

LKTECKKCSEKQKKVGTKVINFMIEHNHPDMFHLLLEARYDPEGVYMAKWKEMKKNDET  
>SexiCSP9  
MKSFIVLCLFGLAAVAMARPDGSTYTDYDNINLDEILGNRRLLTPYIKCILEEGKCTPDGKELKSHIREA  
LEQNCAKCTDAQRNGTRRVLGHLINNEEESWNRLKAKYDPQSKYTVKYELELRKLKQ  
>SexiCSP11  
MKFVLVLCMAAAVLADDEKYTSKYDNIDLDEILTNRLLTAYVNCIMERGKCSPEGKELKEHLVDAIE  
TGCTKCTENQEKGAYKVIEHLIKNELDIWRELTGKYDPSGKWRKTYEDRAKANGIIPE  
>SexiCSP12  
MKSMIVLCVLSVAALVVARPDDSHYTDYDNVDLDEILSNRRLLVPYIKCILDQGKCAPDAKELKEHIR  
EALNECGKCTETQKKGTRRVIEYLINNEEEYWNELTAKYDPERKYTAKYEKELKKIKA  
>SexiCSP13  
MKVLLVLCILAAAALADDKYTDKYDNINLDEILENKRLLLAYVNCVMERGKCSPEGKELKEHLQDAIET  
GCTKCTEAQEKGAYKVIEHLIKNELDIWRELAAYDPKGDWRKKYEDRARANGIQIPE  
>SexiCSP14  
MKVVFLVCVLAADVSHPHDSHYTDKYDNIDLDEILNNKKILTSYINCCLDLGKCTPDGKELKSHIREAL  
ENKCGKCTEAQKNGTRKVMTHLINFEPDYWNQLCAKYDPEGKYKAMYKEYKTLVH  
>SexiCSP15  
MKLIVAVALLCLVAESWAASTYTDKWDNINVDIELESQRLLKAYVDCLLDRGRCTPDGKALKETLPDA  
LENECSKCTDKQKSGSDKVIRHLVNRPEMWKELSAKYDPNNIYQDRYKDIEAVKGQ  
>SexiCSP18  
MMKANCFLIVTLIAVVAADFYNKYDSFDVQPLENDRIILSYTKCFDQGPCTPDADFKKVIPEALE  
TTCGKCSPKQKQLIKTVIKAVISRHPDAWDQLTEKYDTDKKYKESFDKFLAEQD  
>SexiCSP19  
MNFLVLSIVVTMAAFVAAETYTDYDHINIDEIENRLLVPYIKCTLDQGRCTPEGRELKAHIKDAMQT  
SCSKCTEKQKKGARKVVKHIRAKEQEYWKQILAKYDPEDQYKENYETFLAAED  
>SexiCSP20  
MKCIYVLSVLLAFAAVQAEDKYSTENDDLIEAVVADLDTLKGFGCFMDAMTCHAVAADFKKDIPD  
AVATSCAKCTNAQKHIFHKFLLGLKEKLPSDYEAFKKKFDPPQGQYFEALEAAVASS  
>SexiCSP21  
MRVLVLSCLVVAFAADKYNPKYDNFDVDTLISNDRLLKAYINCFLEKGRCTPEGSDFKKALPEAIETT  
CAKCTDKQKGNIRKVIKAIQKHPKEWEDLVKKNDPSGKHRGNFDKFIQGSS  
>SexiCSP22  
MNALLIAVFALAAPLVLYGYDEKYDKLDVDKILGDDALFTAYIDCMLDKGPCSVEHSADFRQLPEVIST  
ACAKCSAIQRQNVRKTVKALSEKKPDDFAQFRTKFDPKGEYEKAFSAFVIGTD  
>SexiCSP23  
MRSWLLCLCVLTVVSCYSQANRYENFNPDAIVQNDRILLAYYKCVMDKGPCTRDGKNFKRVLPETL  
ATACGRCNPKQKTIVRKLLLGIRSKSEPRFLELLDKYNPDRSNRDALYAFLVTGA  
>SexiCSP24  
MKVLLTLCFALGVLAQDQYESANDNFDISEVIGNDRLLHAYANCLLNKGPCTPEVKQVKEKLPEALE  
TRCAKCTDKQKQMGKALAEVKKNHDPDIWKQLVAMYDPQGKYQQAWKDFLQE  
>SexiCSP25  
MKVALLTLCFALGVLAQDTYENANDNFDISEVLNNERLLNSYAKCLLNKGPCTPEVKQVKEKLPEALE  
TRCAKCTDKQKQMGKALAEVKKNHDPDIWQQQLVAMYDPEGKYQQAWKDFLQE  
>SexiCSP28

MKVFFVLSALIAFTAAASLTPAELDLAEAFDYDALFSNDEQRKLVFDCILGKGDCGDYQKVAEISRKILE  
SQCADCNASQKAKYETVLKTIQTKYEPFYNELLKNVAAKKE

>SexiCSP29

MQIKYALVLCVAAVSVAQSQRPPVSDTALDDALQDKRFIQRQLKCALGEGPCDPIGKRLKTLAPLVL  
RGACPQCTPQETKQIQRTLSYVQRNYPQQWAKIVRQYAG

>SexiCSP30

MQVWVVLVACVGLVAGLHVQAGPQMTDAQLEQTLADKSTMQRHIKCALGEGPCDPVGRRLRTL  
APLVLRGACPQCSMQETRQIRRTLAFVQRNYPWEWAKIVRQYG

>FoccCSP1

MVRAGPLACLALSVLVLAEAVDKYEEGRFAHINVDEVLGNQRILGSFIKCFLEGPCTADSRDMKKLL  
PEVIDSKCESCTDNQKKMMAKAVKHVKDNRPDDWERLTNKYDPDHTKTEDIDKFMSDALAM\*

>FintCSP1

MVRAGPLACLALSVLVLAEAVDKYEEGRFAHINVDEVLGNQRILGSFIKCFLEGPCTADSRDMKKLL  
PEVIDSKCESCTDNQKKMMAKAVKHVKDNRPEDWERLTNKYDPDHAKTEDIDKFMSDALAM\*

>FoccCSP2

MAKMLLCLAVVALAALATAAPKPDEKFTTKYDNINIDEILANKRLLNNYLNCLDKPKARCTADALELK  
KSIPDALTNECAKCEKQKELSEKVRHLVDHEKTSWEEVKAKFDPTGIYEKRYEKIAQEKGVAV\*

>FintCSP2

MAKMLLCLAVMALAALATAAPKPDEKFTTKYDNINIDEILANKRLLNNYLNCLDKPKARCTADALELK  
KSIPDALTNECAKCEKQKELSEKVRHLVDHEKTSWEEVKAKFDPTGIYEKRYEKIAQEKGVAV\*

>FoccCSP3

MSRRGLFLAAAPLATVLALAAAKPQPGKLDSDVDVAVLKNKRLFNYYVKCIMDQAPCSAEGSELKES  
LPKDLATKCASCSDTEKSRAKKVINYLKKERKEVWEDFKKKYDPESKWGDLEWASSSW

>FintCSP3

MSRTGLLLAAAAAALAVLALAAAKPQPGKLDSDVDVTLKNKRLFDNYVKCIMDKAPCSAEGSELKESL  
PKDLSTKCAACTDSEKARAKKVINHIKKERKDVWEDFKKKYDPEGKWGDLDWVSAA\*

>FoccCSP4

MKCATVVVLAALCCAASLASGPAAFEVDVAALLKNESAVAGYVKCILGTGECNESAKRLQAIVPN  
ALQGKCSQCSEQQKVIIIGTIVNTMQSKFPNEWELLQKYDPEKKYRADILALAKAVPTGAPTGTAAATT  
AKPAKHW

>FintCSP4

MKCATVVVLAATLCCAASLASGPAAFEVDVAALLKNESAVAGYVKCILGTGECNESAKRLQAIVPN  
ALQGKCSQCSEQQKVIIIGTIVNTMQSKFPNEWELLQKYDPEKKYRADILALAKAVPTGAPTGTAAATT  
DKPAKHW

>FoccCSP5

MKSVPTVCLCLAALALALADDKYTNKFDNVNVDDILKNQSPLDNYFKCLMDKGRCTPDGAELKKS  
LPDALTSRCSKCTEKQKMQTEKVVSFLIEKKPVLWKELKAKYDPEGSYEATYKQDAVSHGIKV\*

>FintCSP5

MKSAACVCLCLAALALALAEDKYTNKFDNVNVDDILKNQRLLDNYFKCLMDKGRCTPDGAELKKS  
LPDALTSRCSKCTEKQKMQTEKVVRFLIEKKPVLWQELKAKYDPQGQYEATYKQEAHAHGIKV\*

>FoccCSP6

MNSVSAPALLLVVALATVHAAPSDGPASTECPAGIKAAKAGPAAQGVKYTTKYDNINVDMVLHN  
ERLLNNYMECLMDRSACSKQGLLKEIIPDALQTDARCSEKQKQIAGTIMSYLLQYKKKYWDELLCK  
YDPEGNFRKKYEVEDDEDDEE\*

>FintCSP6

MKSTAVLLLVALAASAVLAAPKDATKDAKGGTTQCPPGIKPAKAGPAAQGGTYTTKYDNLNVDMVL  
HNERLLKNYIDCLMDRKPCSKEGQLLKEIPDALQTECSRCSEKQKQIAGTIMSYLLQYKKNYWDELLC  
KYDPEGTFREKEYEVEDDEEED

>FoccCSP7

MVPLRTAVAVLVLA AVARAALVQRVRRDDDDDEKYTSSFDNVLDLTVLNSDRLLTNYFRCIMDEGP  
CTPDAKELKRVPEALSNKCAKCSERHRAGA EKVLTFLIK NREAEWTRLEKKYDPSGQYRKLYEAAEQ  
RGLKI\*

>FoccCSP8

MTASTMSLVIAA VAAVVVLAASPSAAAPQSMANFGKGNINAYLMDPMLVSKTISCVGVPCTRL  
GNSLKSAPI TVLNNCKGCDQQQAANASKLIDYIQSNYPRDYDMILAKYRNAPPRG\*

>TcasCSP1

MLILQIAHLCAQFCLLAAIFTCVKPQLTRISDEAIESTLNDRRYLLRQLKCATGEAPCDPVGRRLKSLAP  
LVLRGSCPQCTPQEMKQIQKVLAFVQKNYPKEWNKILHQYAG

>TcasCSP2

MKIILAVLIATAVAATYDVYPTKYDNVDIDAILHNKRLFDNYLQCLLKGKCNEEAAILRDVIPDALIT  
GCRKCNDHQKVSVEK VIRFLIKERNSDWQQ LISVYDPKGEYQTQYAHYLEKI

>TcasCSP3

MLFTVFLVLTCAHVVFLEEYVIPDNIDIDILSNERLLKNYVNCLLDKGRCTPEGKKLKSTIPEALSTDC  
AKCNEKVKANVRKVLHHLIDNKPDMWKQLEAKYDPSGEYRSKYKDELEKNGIHV

>TcasCSP4

MYSYLIPLYLFLFVHYGWSEDTTHKYTTKYDNIDLENVVKNERLLKSYVDCLEKGRCPDGLLELKKNM  
P  
DAIETDCSKCSEKQKEGSDFIMRYLIDNKP DYWKALEAKYDPDGT YKKRYFESQKDEVSKVEA

>TcasCSP5

MKTFVILFFGVFFIIFSDFVNGKTLHRSTRDDKYTTRYDNVDVDRILHSKRLLLNYINCLLEKGPCSPEG  
RELKKILPDALVTNCSKCSEVQKKQAGKILTFVLLNYRNEWNLVAKYDPDGIYRKQYEIDDDYDYSEL  
D  
SAKK

>TcasCSP6

MIPLIAIAGILAVSAAPAEFYESRYDHLDVESILNNRRMVNYAAACLLSKGPCPPQGVDLKRVLPEALQ  
T  
NCAKCTEKQRTAAYRSIKRLKKEYPKIWEQLRAVWDPDDVFIRKFETSFESGKPSGVISTNTSPSPILS  
NRFGENEEADAASNVISSTPLPPTTSTTTTTLTTKFTTKPSTKPTNKPVVVTKPPQAPPFATVGANLQ  
A  
TVSFGTNLVGGIVRSLGTLGSRVVESGTKLANMVISAIRP

>TcasCSP7

MKLISAVILCAFLVAVSAAENKYTNKYDNVDVDKILNNDRLVTNYIKCLMDEGPCTSEGRELKKTLPDA  
L

SSGCTKCNQKQKETAEKVIRHLTQKRARDWERLSKKYDPQGQYKKRYEEHVATSRAA

>TcasCSP8

MPLVKSLVWVLLIGVVYQVQGQLGLAGNNYIEKQLLCALDKAPCDALGNQIKGALPEIIGKNCERCD  
SR  
QVANARRIARYVQTKHPDVWVALVKKYSV

>TcasCSP9

MTAIVFLLALACLKTYVSSQEYLVPQNIDVDEILKNDRLTRNYLDCVLGKGKCTPEGEELKKDIPEALQN  
GCAKCNEKHKEGVRKVIHHLIENKPNWWQELESKFDPQGEYKKKYDELLKKEGLAN

>TcasCSP10

MKTFVLVAFAAVLGLALARPQEKYTTKYDNIDLEEILKSDRLLKNYFNCLMERGTCSPDGEELKKALPD  
A  
LHSGCSKCTEKQKEGSRKIIHYLIDNKRDDWNELEAKYDKDGVYRQKYKDVIEKEGIKL

>TcasCSP11

MKTLVPLFFVIAIASSLAENSKYTTKYDNVDLDEIISKDRLLKNYVNCLEKGKCTPDGAELKRHLPA  
LHTECSKCSETQKNGSKKIMRHLIDHKRDWWNELEEKYDKEGEYRKKYAEIKGKKD

>TcasCSP12

MKTLVLVLFVAVLSVFAADKYTTKYDNIDLNQILKSDRLLKNYVNCLLDRGKCPDGGQELKNNLADA  
LQ  
TSCSKCSQRQKDGSRTHIRYLIKNRDDWNELEAKYDPTGIYKNKYADELKAEGIVL

>TcasCSP13

MFLAIVLVCACTNVLSEEYTNQYNDELDAALKSERLMKSYFECLLGTGKCTPSGEELKKDIPDALKNE  
C  
AKCNDKHKEGIRKVIHYLVKQKPEWWEQLQKKFDPQGIYKKRYQNYLDKEGLKA

>TcasCSP14

MFATSALFAFICIQGLVSAEEYLVPQNIDLDEILKNDRLTRNYIDCILGKGKCTPEGEELKRDIPALQN  
ECAKCNEKHKEGVRKVLHHLIKNPNWWQELEAKFDPKGEYKQKYNKLEKEGLQA

>TcasCSP15

MIFKIHFLVFGALLTYVSSVEYLILREIDTILKNDQMTRNYLDCVLDKGKCTKEAEKLKKGITETMKNGC  
VKCEQKQKEDVHKVFQHLMIHDPNWWHELETKFNPHHEIKLQHLHQSKFNPHEEVKLQHLHQFPH  
HDFLE  
REGFIR

>TcasCSP16

MTAIVFLLALACLKTYVSSQEYLVPQNIDVDEILKNDRLTRNYLDCVLGKGKCTPEGEELKKDIPEALQN  
GCAKCNEKHKEGVRKVIHHLIENKPNWWQELESKFDPQGEYKKKYDELLKKEGLAN

>TcasCSP17

MFKVLVVFACVQAYVYAAEYTPQNIDIDEILKNDRLTKNYLDCILEKGKCTPEGEELKKDIPDALQNE  
CAKCNEKHKEGVRKVIHHLIKNPSWWQELQEYDPKGEYKSRYNHFLEEEGLN

>TcasCSP18

MLFTVFLVLTCAHVVFLEEYVIPDNIDIDDILSNERLLKNYVNCLLDKGRCTPEGKKLKSTIPEALSTDC  
AKCNEKVKANVRKVLHHLIDNKPDMWKQLEAKYDPSGEYRSKYKDELEKNGIHV

>TcasCSP19

MKFFIAFLMLLGAVWCEQYTTKYDNINVDEILASERLLKNYFNCIMDRGACTPDADDELKRVLPDALKS  
DC  
AKCSEKQKEMTKKVIHFLSHNKQQMWKELTAKYDPDGIYFEKYKDKFDS

>TcasCSP20

MRFFVIFVACVSVALARPEDQYTIKYDNVNLKEILQSDRLTENYVNCLEKKPCTPDGEELKRVLPDAL  
KTSCAKCTDKQKQGAKTVIQHLYKNKQDWWKQLEAKYDPEHTYVKAHEDELKAL
